# 1 ***Frequent extrachromosomal oncogene amplification drives*** 2 ***aggressive tumors***

3 **Authors:** Hoon Kim<sup>1§</sup>, Nam Nguyen<sup>2§</sup>, Kristen Turner<sup>3</sup>, Sihan Wu<sup>3</sup>, Jihe Liu<sup>1</sup>, Viraj  
4 Deshpande<sup>2</sup>, Sandeep Namburi<sup>1</sup>, Howard Y. Chang<sup>4,5</sup>, Christine Beck<sup>1</sup>, Paul  
5 Mischel<sup>3,6,7\*</sup>, Vineet Bafna<sup>2\*</sup>, Roel Verhaak<sup>1\*</sup>

## 6 7 **Affiliations:**

8 1. The Jackson Laboratory for Genomic Medicine, Farmington, Connecticut 06032, USA

9 2. Department of Computer Science and Engineering, University of California at San  
10 Diego, La Jolla, California 92093, USA

11 3. Ludwig Institute for Cancer Research, University of California at San Diego, La Jolla,  
12 California 92093, USA

13 4. Center for Personal Dynamic Regulomes, Stanford University, Stanford, California  
14 94305, USA

15 5. Howard Hughes Medical Institute, Stanford University, Stanford, CA 94305, USA

16 6. Moores Cancer Center, University of California at San Diego, La Jolla, California  
17 92093, USA

18 7. Department of Pathology, University of California at San Diego, La Jolla, California  
19 92093, USA

20

21 §-co-first authors

22 \*co-corresponding authors

23

24 **Extrachromosomal DNA (ecDNA) amplification promotes high oncogene copy**  
25 **number, intratumoral genetic heterogeneity, and accelerated tumor evolution<sup>1-3</sup>,**  
26 **but its frequency and clinical impact are not well understood. Here we show, using**  
27 **computational analysis of whole-genome sequencing data from 1,979 cancer**  
28 **patients, that ecDNA amplification occurs in at least 26% of human cancers, of a**  
29 **wide variety of histological types, but not in whole blood or normal tissue. We**  
30 **demonstrate a highly significant enrichment for oncogenes on amplified ecDNA**  
31 **and that the most common recurrent oncogene amplifications arise on ecDNA.**  
32 **EcDNA amplifications resulted in higher levels of oncogene transcription**  
33 **compared to copy number matched linear DNA, coupled with enhanced chromatin**  
34 **accessibility. Patients whose tumors have ecDNA-based oncogene amplification**

35 **showed increase of cell proliferation signature activity, greater likelihood of lymph**  
36 **node spread at initial diagnosis, and significantly shorter survival, even when**  
37 **controlled for tissue type, than do patients whose cancers are not driven by ecDNA-**  
38 **based oncogene amplification. The results presented here demonstrate that**  
39 **ecDNA-based oncogene amplification plays a central role in driving the poor**  
40 **outcome for patients with some of the most aggressive forms of cancers.**

41 Somatic gain of function alterations in growth controlling genes, especially driver  
42 oncogenes, plays a central role in the development of cancer<sup>4-6</sup>. Oncogene amplification  
43 is one of the most common gain of function alterations in cancer, enabling tumor cells to  
44 circumvent the checks and balances that are in place during homeostasis and providing  
45 selective and autonomous advantage to drive tumor growth. EcDNA-based amplification  
46 has long been recognized as a way for cells to increase the copy number of specific  
47 genes<sup>7,8</sup>, but their frequency appears to be vastly underestimated<sup>2,9</sup>. EcDNA amplification  
48 has recently emerged as a powerful mechanism for enabling tumors to concomitantly  
49 reach high copy of growth promoting genes, while still maintaining intratumoral genetic  
50 heterogeneity through its non-chromosomal mechanism of inheritance<sup>1-3</sup>. To date,  
51 cytogenetic methods requiring live cells in metaphase have been used to infer  
52 intranuclear localization of DNA amplifications and extrachromosomal status<sup>10</sup>.  
53 Consequently, it has been challenging to accurately assess the frequency, distribution,  
54 and clinical impact of ecDNA-based amplification. More recently computational analyses  
55 of whole-genome sequencing data have suggested a relatively high frequency of ecDNA  
56 in some cancer types<sup>11,12</sup>. Here we set out to perform a global survey of the frequency of  
57 ecDNA-based oncogene amplification, while investigating its contents and determining  
58 its clinical context.

59 EcDNA are characterized by two distinguishing properties: 1. ecDNAs are highly and  
60 focally amplified and 2. they are circular. These properties provide a basis for the  
61 AmpliconArchitect tool, that enables detection and characterization of ecDNA from whole-  
62 genome sequencing data (**Fig. 1A**)<sup>11</sup>. We applied AmpliconArchitect<sup>11</sup> to whole-genome  
63 sequencing data from The Cancer Genome Atlas (TCGA), to quantify and characterize  
64 the architecture of amplified regions that are larger than 10kb and have more than 4

65 copies (CN>4) above median sample ploidy (**Supplementary Table 1**). Amplicons were  
66 classified as ‘Circular’ (**Extended Data Fig. 1A**) representing amplicons residing  
67 extrachromosomally or ecDNA structures that reintegrated into non-native chromosomal  
68 locations as homogenously staining regions (HSRs), ‘Amplified-noncircular’ for linear  
69 amplifications, or as ‘heavily rearranged’, for non-circular amplicons containing segments  
70 from different chromosomes, or regions that were very far apart on chromosomes (>1Mb)  
71 regions. Sample lacking amplifications were labeled ‘no copy number amplification (CNA)  
72 detected’.

73 To evaluate the accuracy of the computational predictions, we similarly analyzed whole  
74 genome sequencing data from a panel of 34 cancer cell lines<sup>1,2</sup>, for which tumor cells in  
75 metaphase could be examined. We used 15 unique fluorescence in-situ hybridization  
76 (FISH) probes in combination with matched centromeric probes (60 distinct “cell-line,  
77 probe” combinations) to determine the chromosomal or extrachromosomal location of a  
78 set of amplicons. We observed that 100% of amplicons characterized as ‘Circular’ by  
79 whole genome sequencing profile demonstrated extrachromosomal fluorescent signal  
80 (**Extended Data Fig. 1B**). Circular amplicons had a median count of 14.5 ecDNA per cell,  
81 in contrast with the ‘Amplified-noncircular’ category, which had a median count of 0.0  
82 ecDNA per cell. However, ecDNAs may be undercounted in amplicons with low copy  
83 number. ‘Heavily rearranged amplicons’ showed at least one ecDNA per cell in two of five  
84 cases, suggesting that this category consists of a mixture of chromosomal and  
85 extrachromosomal amplifications. We excluded the more ambiguous category of ‘heavily  
86 rearranged’ amplicons from further comparisons, confining our analysis to 1,695 TCGA  
87 samples. The analytic results of the 256 samples containing the more ambiguous ‘heavily  
88 rearranged amplicons’ are presented in the supplement (**Extended Data Fig. 2**).

89 We found that 436 (26%) of the 1,695 tumor samples carried one or more Circular  
90 amplicons, suggesting that ecDNA-based amplification is a common event in human  
91 cancer (**Fig. 1B**). In contrast, Circular amplifications were found in <0.5% of matched  
92 whole blood or normal tissue samples, suggesting that extrachromosomal amplification  
93 is a mechanism that is used primarily by cancer cells (**Fig. 1B**). Of note, our analysis does  
94 not reflect the presence of circulating cell free DNA in blood, or of small (<1 kb), circular,

95 non-amplified DNAs, that have been shown to be common in non-neoplastic and tumor  
96 tissues<sup>13-15</sup>. EcDNA-based Circular amplicons were found in all cancer types except  
97 acute myeloid leukemia and thyroid carcinoma, including at high frequency in many  
98 cancers that are considered to be amongst the most aggressive histological types. The  
99 distribution of Circular amplicon frequencies across the samples are consistent with  
100 earlier results on cancer models, showing that ecDNA driven amplifications were a  
101 defining feature of multiple cancer sub-types, but not normal cells<sup>2</sup>.

102 The chromosomal distribution of the 627 Circular amplicons was highly non-  
103 random (**Fig. 1C**), more so when compared to the Amplified-noncircular regions  
104 (**Extended Data Fig. 3A**). We found that 41% of the 24 most recurrent amplified  
105 oncogenes were most frequently present on Circular amplicons, with frequencies ranging  
106 from 25% of samples for *PAX8* to 91% for *CDK4* (**Fig. 1D**). The result carried over to a  
107 larger list of 707 genes that were amplified in at least five samples, with 41% of those  
108 oncogenes most frequently being amplified on circular structures (**Extended Data Fig.**  
109 **3B**). We found that oncogenes amplified on circular amplicons achieved higher copy  
110 numbers than the same oncogenes amplified on Amplified-noncircular structures  
111 (**Extended Data Fig. 3C**). We further observed that the association between ecDNA  
112 structures and oncogene amplification did not extend to breakpoints. For 24 frequently  
113 amplified oncogenes, the frequency of observing a specific number of breakpoints in a  
114 unit interval decayed exponentially, consistent with random occurrence around the  
115 oncogene (**Fig. 1E; Extended Data Fig. 3D, Extended Data Fig. 3E**). These results  
116 suggest that ecDNA are formed through a random process, where selection for higher  
117 copies of growth promoting driver oncogenes leads to rapid oncogene amplification  
118 during cancer development and progression, in a way that also retains intratumoral  
119 genetic heterogeneity, due to its mechanism of uneven inheritance<sup>3,16</sup>.

120 Circular amplicons also differed from Amplified-noncircular amplifications in other  
121 notable ways. Circular and Amplified-noncircular amplifications showed similar likelihood  
122 of occurring in samples with chromosome-arm level aneuploidy (**Extended Data Fig. 4A**)  
123 and whole-genome duplication, which might arise as a result of chromosome  
124 missegregation<sup>17</sup> or other mitotic errors<sup>18</sup> (**Extended Data Fig. 4B**). Smaller and more

125 focal genomic gains and losses result from different mutagenic processes, associated  
126 with genomic instability. We observed an increase in the number of DNA segments in  
127 samples marked by Circular amplicons, compared to other categories (**Fig. 2A**). The  
128 frequency of copy number losses was comparable between Circular and Amplified-  
129 noncircular amplicon samples (**Extended Data Fig. 4C**), but genomic segment gains  
130 were more frequently detected in samples with circular amplification (Wilcoxon rank sum  
131 test:  $p\text{-val} < 1e\text{-}14$ ) (**Extended Data Fig. 4D**). This observation coincided with a threefold  
132 increase in gene fusion events inferred from matching RNAseq profiles (**Fig. 2B**; Binomial  
133 test:  $p\text{-value} < 1e\text{-}138$ ) compared to Non-circular amplification. Clustered mutations, also  
134 referred to as kataegis, were significantly more frequently detected in Circular amplicons  
135 relative to Amplified-noncircular amplicons, suggesting increased incidence of kataegis  
136 (Hypergeometric test:  $p\text{-value} \cong 0$ ) (**Extended Data Fig. 4E**). The majority of Circular  
137 amplicon breakpoints showed no or minimal sequence homology (<5 bp), raising the  
138 possibility that non-homologous end joining could be involved in ecDNA formation. In  
139 contrast, Amplified-noncircular amplicon breakpoints showed significantly more micro-  
140 homologies than were seen on circular amplicons (**Extended Data Fig. 4F**,  $p\text{-}$   
141  $\text{value} < 0.0005$ ; two-sided Fisher's exact test).

142 We sought to examine the transcriptional consequences of circular ecDNA  
143 amplification at the population level. We detected a highly significant correlation between  
144 DNA copy number and gene expression level in all categories of DNA amplification,  
145 Circular and Non-circular. However, at comparable DNA copy number, oncogenes on  
146 Circular amplicons were significantly more highly expressed than those on Amplified-  
147 noncircular amplicons ( $p\text{-value} < 0.003$ ; Wilcoxon rank sum test; **Fig. 3A**; **Extended Data**  
148 **Fig. 5**), showing a higher transcriptional rate (2.6X higher compared to Amplified-  
149 noncircular, 8.3X higher compared to oncogenes on non-amplified regions). To test if the  
150 epigenetic mechanisms governing gene expression were different between Circular  
151 amplifications and Amplified-noncircular regions, we analyzed the overlapping ATAC-seq  
152 profiles available for 24 samples<sup>19</sup>. The results (**Fig. 3B**) showed that chromatin of  
153 Circular amplicons was significantly more accessible compared to Amplified-noncircular  
154 categories (1.3 times higher ATAC-seq signal; Wilcoxon rank sum test;  $p\text{-value} < 0.003$ ),

155 suggesting that increased accessibility plays a role in dysregulation and higher  
156 expression of oncogenes on circular amplifications (ecDNAs).

157         Having developed a way to stratify tumors based upon amplification architecture,  
158 we examined the impact of ecDNA-based amplification on two hallmarks of cancer,  
159 immune evasion and cell proliferation. We used previously developed gene expression  
160 signatures<sup>20</sup> to evaluate the distribution of immune infiltrate and cell proliferation scores  
161 by amplicon grouping. The cellular proliferation but not immune infiltration pathway  
162 scores were significantly higher (**Fig. 4A**,  $p\text{-val} < 1e\text{-}7$ ; Wilcoxon Rank Sum Test;  
163 **Extended Data Fig. 6**) in the Circular amplification category compared to the other two  
164 groups. We did not observe difference in activity of the immune signature score  
165 between groups (**Fig. 4A**,  $p\text{-val} < 0.03$ ; Wilcoxon Rank Sum Test). The increased  
166 activity of the cell proliferation gene signature suggested a higher rate of proliferation  
167 and tumors that behave more aggressively.

168         To determine whether cancers that have ecDNA amplification were associated  
169 with tumor progression, we examined the impact of circular amplification on lymph node  
170 status at initial presentation, and overall survival. We found that the proportion of cases  
171 in which the tumor had spread to a lymph node at the initial time of diagnosis was  
172 significantly increased in tumor samples that had either circular or non-circular  
173 amplification (**Fig. 4B**;  $p\text{-value} < 0.02$  no- CNA vs Amplified-noncircular,  $p\text{-value} < 1.0e\text{-}$   
174  $05$  Circular-amplicon vs Amplified-noncircular). Additionally, we found a significant  
175 difference in overall survival of patients stratified by amplification category. Patients  
176 whose tumors contained circular amplification associated with significantly worse overall  
177 outcomes compared to patients whose tumors harbored either non-circular amplifications  
178 or no amplifications (**Fig. 4C**;  $p\text{-val} < 1e\text{-}15$  versus no-CNA detected;  $p\text{-val} < 0.07$  against  
179 Amplified-noncircular; Log-rank test). To account for the possibility that differences in  
180 survival rate are being influenced by the disease subtype, as circular amplicons are much  
181 more prevalent in aggressive cancers such as glioblastoma, we fit the data to a Cox  
182 Hazard model that tested survival after controlling for disease subtype. The model  
183 showed that patients with circular amplicons had significantly higher hazard rates (**Fig.**  
184 **4D**; 28% increase in hazard rate relative to no-CNA,  $p\text{-val} < 0.03$ ).

185 Cancer genomics is itself evolving from reading out the “code” to unraveling its function.  
186 The 3D organization of the genome plays a critical role in determining how that genome  
187 functions, or malfunctions, as occurs in cancer. The data presented here demonstrate  
188 that ecDNA play a critical role in cancer, providing a mechanism for achieving and  
189 maintaining high copy oncogene amplification and diversity. This mechanism of  
190 amplification is operant in a large fraction of human cancers, and contributes to the poor  
191 outcomes for patients. The potential to leverage the presence of ecDNAs in a quarter of  
192 human cancers for diagnostics or therapeutics provides a link between cancer genomics  
193 and broad utility for patient populations.

194

## 195 METHODS

### 196 **AmpliconArchitect**

197 We used AmpliconArchitect<sup>11</sup> infer the architecture of the ‘amplicons’ --- large (>10kb)  
198 rearrangements with high copy numbers (CN>4) that are inferred to have co-amplified  
199 as a structure. AmpliconArchitect takes as an input aligned WGS sequences and seed  
200 intervals of the amplicon. AmpliconArchitect then searches for other regions that belong  
201 to the amplicon by exploring the seed intervals, and extends beyond the intervals if it  
202 encounters copy number changes or discordant edges that support a breakpoint. The  
203 collection of intervals and breakpoints are combined to form a fine network with nodes  
204 representing segments and edges representing rearrangements, which we call the  
205 breakpoint graph. This breakpoint graph is can be further decomposed into simple  
206 cycles to identify any circular paths within the amplicon structure, which is indicative of  
207 ecDNA presence. The detected amplicons were annotated with the Ensembl Release 75  
208 gene database (GRCh37).

209

### 210 **Amplicon and sample classification**

211 As a prerequisite, amplicons must contain  $\geq 10$ kb of genomic segments amplified to at  
212 least four copies above median ploidy in order to be considered a valid amplicon. We  
213 then use the AmpliconArchitect derived breakpoint graph to classify amplicons into  
214 three categories: 1. Circular amplification; 2. Heavily rearranged amplification; and, 3.

215 Amplified-noncircular (**Extended Data Fig. 1A**). Amplicons were denoted as Circular  
216 amplification if the segments form a cycle in the graph of total size at least 10kb and has  
217 at least a copy count of four. Non-circular amplicons were denoted as heavily  
218 rearranged if the breakpoints connect segments from different chromosomes, or distal  
219 (>1Mb) regions (**Extended Data Fig. 1A**). Non-circular, non-distal amplicons were  
220 denoted as locally rearranged. All other regions that were not part of any amplicon  
221 structure were classified as not-amplified. While an amplicon may fit the requirements  
222 for several categories (i.e., a circular amplicon may also comprise heavily rearranged  
223 amplifications), priority was given to the circular amplification category, followed by  
224 heavily rearranged and finally amplified-noncircular. Similarly, samples were classified  
225 based upon what amplicons are present within the sample, giving precedence to the  
226 presence of amplicon with highest priority. For example, a sample with both circular  
227 and heavily rearranged amplification would be classified as circular amplification.  
228 Samples without any amplicons are classified as `No CNA detected`.

### 229 **Cell line validation**

230 We ran AmpliconArchitect on the whole-genome sequencing data from 11 glioblastoma  
231 neurosphere cultures from deCarvalho et al <sup>1</sup>. with FISH images and the 23 cell lines  
232 from different cancer types from the Turner et al <sup>2</sup> study. Fluorescence in-situ  
233 hybridization (FISH) was performed in parallel, as described. The seed interval for each  
234 cell line included the probe region. For each probe, we reported whether it landed in an  
235 amplicon (inferred from AmpliconArchitect), and if so what was the amplicon  
236 classification. The distribution of the average ecDNA per cell was computed as the  
237 average number FISH probes that co-localized on ecDNA across all the images for that  
238 particular cell line+FISH probe combination (**Extended Data Fig. 1B**). Wilcoxon Rank  
239 Sum test was used to detect significant differences in average ecDNA counts per cell  
240 across the amplicon classes.

### 241 **TCGA processing**

242 We processed TCGA whole genome sequencing BAMs through the Institute for  
243 Systems Biology Cancer Genomics Cloud (<https://isb-cgc.appspot.com/>) that provides a  
244 cloud-based platform for TCGA data analysis. We used genome-wide snp6 copy



245 number segments with copy number log ratio equal to 1 as seed interval(s) of interest  
246 that are required for the input to AmpliconArchitect<sup>11</sup>. Default parameters and reference  
247 files were used for all other settings. Details on how to run AmpliconArchitect have been  
248 described in the corresponding manuscript<sup>11</sup> and its source code depository.

249 We ran AmpliconArchitect on tumor and normal WGS samples from 1979 patients.  
250 Samples were classified based upon the amplicon with highest precedence present in  
251 the sample, or classified as 'No CNA detected' if no amplicons are present in the  
252 sample. Samples classified as highly-rearranged are removed from further analysis due  
253 to the ambiguity of ecDNA status of the sample.

#### 254 **TCGA processed data**

255 The processed data (hg19) and clinical data were found at the GDC  
256 (<https://portal.gdc.cancer.gov/legacy-archive/search/f>) and the PancanAtlas publication  
257 page (<https://gdc.cancer.gov/about-data/publications/pancanatlas>). Somatic mutations  
258 for TCGA whole genome sequencing were downloaded from the ICGC PCAWG portal  
259 (<https://dcc.icgc.org/pcawg>)<sup>21</sup>.

#### 260 **Oncogene analysis**

261 We examined the enrichment of the 24 recurrent oncogenes known to be activated by  
262 amplification by counting the total number of base pairs from the amplicon classes from  
263 all the tumor samples that overlap these oncogenes. We then simulated 10,000  
264 replicates by sampling random regions of the same size of the amplicons and computed  
265 an empirical expected distribution of base pairs covering the oncogenes if the amplicons  
266 were randomly sampled across the genome. We report the z-score between the  
267 empirical distribution and observed value for the amplicon classes. We also report the  
268 average copy count, estimated from AmpliconArchitect. For each of these oncogenes  
269 on an amplicon structure, we reported the position of breakpoint detected within a 1 MB  
270 region flanking the oncogene using the breakpoint graph to infer breakpoints. We  
271 partitioned the region into 1000 bp windows and counted the total number of  
272 breakpoints that landed in each window, and display a histogram of these counts. We  
273 modeled the histograms using an exponential distribution and show that under the

274 assumption that the breakpoints are distributed randomly, the histograms closely follow  
275 the exponential distribution.

276 We used *allOnco* (<http://www.bushmanlab.org/links/genelists>), a set of 2,579 cancer  
277 genes generated from curated collections cancer genes from many different  
278 publications. We identified all amplicons that overlapped with the oncogenes and report  
279 the proportion amplified oncogenes that are circular.

## 280 **Genomic instability analyses**

281 We computed total copy number gains/losses as the number of snp6 copy number  
282 segments with copy number  $\geq 4$  or  $\leq 1$ . Wilcoxon Rank Sum test was used to test for  
283 a significant difference between the two distributions. We used the data from a previous  
284 study<sup>22</sup> to estimate the genome doubling status and chromosomal arm duplication and  
285 loss for each sample. Wilcoxon Rank Sum test was used to test significance between  
286 the distribution of gains and losses and Chi-squared test was used to test significance  
287 between the distribution of whole genome doublings.

288 We used the data from the TCGA fusion database (<https://tumorfusions.org/>)<sup>23</sup> to  
289 identify fusions events that occur on an amplicon. For each fusion in the database, we  
290 consider it valid if both ends of the fusion breakpoint junction occur on the same  
291 amplicon. In total, 710 amplified fusions were detected. We computed the average  
292 fusion events per 10 Mb as the total number of fusions that landed within an amplicon  
293 class divided by the sum of all the base pairs of the amplicon class multiplied by  $10^7$ .  
294 To test whether circular amplicons were enriched fusion events, we computed the p-  
295 value of observing at least the number of fusion events on circular amplicon under a  
296 binomial distribution where the probability  $p$  was estimated using the total number of  
297 fusion events on the amplified-noncircular divided by the total base pairs of the  
298 amplified non-circular event and the number of trials  $n$  as the total base pairs of the  
299 circular amplicons.

## 300 **RNAseq and ATACseq analyses**

301 Of the 1,695 tumor samples, 1,608 had RNA-seq data in the format of FPKM-UQ  
302 expression data. For each gene within each disease cohort, we computed a baseline  
303 FPKM-UQ as the average FPKM-UQ of all samples for which the gene was not found

304 on an amplicon (i.e., average expression of the unamplified gene). We then computed  
305 the fold-change in expression of each gene on each amplicon as the FPKM-UQ of the  
306 amplified gene divided by the average FPKM-UQ of the unamplified samples, and  
307 report the distribution of fold-changes versus the copy number. Tukey's range test was  
308 used to test significance between slope of the FPKMs for circular and amplified-  
309 noncircular.

310 ATAC-seq profiles were available for 24 samples. For each amplicon in each sample,  
311 fold-change in ATAC-seq signal was computed as the average ATAC-seq signal across  
312 the amplicon region divided by the average ATAC-seq signal for the same region in the  
313 unamplified samples of the same cancer type. Wilcoxon Rank Sum test was used to  
314 test significance between the two distributions.

### 315 **Kataegis**

316 Localized mutation clusters (kataegis loci) were defined as having 6 or more  
317 consecutive mutations with an inter-mutation distance of < 1kb in a similar way to a  
318 previously used approach <sup>24</sup>.

### 319 **Inferring breakpoint homologies**

320 For each breakpoint, sequencing reads around +/- 1000 bps of the breakpoint were  
321 locally reassembled with SvABA<sup>25</sup> to produce a contiguous consensus sequence of  
322 each breakpoint, precise breakpoint positions, and the level of homology at breakpoints.

### 323 **Statistical analysis**

324 Survival curves were estimated with the Kaplan–Meier method, and comparison of  
325 survival curves between groups was performed with the log-rank test in R survival  
326 package. Hazard ratios were estimated with the Cox proportional hazards regression  
327 model in the survival R package.

### 328 **Competing Interests**

329 P.S.M., H.Y.C., V.B. and R.G.W.V. are co-founders of Boundless Bio, Inc. (BB), and  
330 serve as consultants. V.B. is a co-founder, and has equity interest in Digital Proteomics,  
331 LLC (DP), and receives income from DP. The terms of this arrangement have been  
332 reviewed and approved by the University of California, San Diego in accordance with its

333 conflict of interest policies. BB and DP were not involved in the research presented  
334 here.

## 335 **ACKNOWLEDGEMENTS**

336 This work was supported by the Ludwig Institute for Cancer Research (P.S.M.), Defeat  
337 GBM Program of the National Brain Tumor Society (P.S.M.), NVIDIA Foundation,  
338 Compute for the Cure (P.S.M.), The Ben and Catherine Ivy Foundation (P.S.M.),  
339 generous donations from the Ziering Family Foundation in memory of Sigi Ziering  
340 (P.S.M.), and Ruth L. Kirschstein National Research Service Award This work was also  
341 supported by the following NIH grants: NS73831 (P.S.M.), GM114362 (V.B.), R01  
342 CA190121 and Cancer Center Support Grant P30 CA034196 (R.G.W.V),  
343 R35CA209919 (H.Y.C.), RM1-HG007735 (H.Y.C.), and NSF grants: NSF-IIS-1318386  
344 and NSF-DBI-1458557 (V.B.); and grants from the Musella Foundation and the  
345 B\*CURED Foundation (R.G.W.V). H.Y.C. is an Investigator of the Howard Hughes  
346 Medical Institute. The results published here are in whole or part based upon data  
347 generated by the TCGA Research Network: <https://www.cancer.gov/tcga>. Analysis of  
348 TCGA was made possible through the Cancer Genomics Cloud of the Institute for  
349 Systems Biology (ISB-CGC).

350

## 351 **REFERENCES**

- 352 1 deCarvalho, A. C. *et al.* Discordant inheritance of chromosomal and extrachromosomal DNA  
353 elements contributes to dynamic disease evolution in glioblastoma. *Nat Genet* **50**, 708-717,  
354 doi:10.1038/s41588-018-0105-0 (2018).
- 355 2 Turner, K. M. *et al.* Extrachromosomal oncogene amplification drives tumor evolution and  
356 genetic heterogeneity. *Nature* **543**, 122-125, doi:10.1038/nature21356 (2017).
- 357 3 Verhaak, R. G. W., Bafna, V. & Mischel, P. S. Extrachromosomal oncogene amplification in tumor  
358 pathogenesis and evolution. *Nat Rev Cancer*, doi:10.1038/s41568-019-0128-6 (2019).
- 359 4 Weischenfeldt, J. *et al.* Pan-cancer analysis of somatic copy-number alterations implicates IRS4  
360 and IGF2 in enhancer hijacking. *Nat Genet* **49**, 65-74, doi:10.1038/ng.3722 (2017).
- 361 5 Zack, T. I. *et al.* Pan-cancer patterns of somatic copy number alteration. *Nat Genet* **45**, 1134-  
362 1140, doi:10.1038/ng.2760 (2013).
- 363 6 Beroukhi, R. *et al.* The landscape of somatic copy-number alteration across human cancers.  
364 *Nature* **463**, 899-905, doi:10.1038/nature08822 (2010).
- 365 7 Alt, F. W., Kellems, R. E., Bertino, J. R. & Schimke, R. T. Selective multiplication of dihydrofolate  
366 reductase genes in methotrexate-resistant variants of cultured murine cells. *J Biol Chem* **253**,  
367 1357-1370 (1978).

- 368 8 Kohl, N. E. *et al.* Transposition and amplification of oncogene-related sequences in human  
369 neuroblastomas. *Cell* **35**, 359-367 (1983).
- 370 9 Mitelman, F., Johansson, B. & Mertens, F. The impact of translocations and gene fusions on  
371 cancer causation. *Nat Rev Cancer* **7**, 233-245, doi:10.1038/nrc2091 (2007).
- 372 10 Trask, B. J. Fluorescence in situ hybridization: applications in cytogenetics and gene mapping.  
373 *Trends Genet* **7**, 149-154, doi:10.1016/0168-9525(91)90378-4 (1991).
- 374 11 Deshpande, V. *et al.* Exploring the landscape of focal amplifications in cancer using  
375 AmpliconArchitect. *Nat Commun* **10**, 392, doi:10.1038/s41467-018-08200-y (2019).
- 376 12 Xu, K. *et al.* Structure and evolution of double minutes in diagnosis and relapse brain tumors.  
377 *Acta Neuropathol*, doi:10.1007/s00401-018-1912-1 (2018).
- 378 13 Moller, H. D. *et al.* Circular DNA elements of chromosomal origin are common in healthy human  
379 somatic tissue. *Nat Commun* **9**, 1069, doi:10.1038/s41467-018-03369-8 (2018).
- 380 14 Kumar, P. *et al.* Normal and Cancerous Tissues Release Extrachromosomal Circular DNA  
381 (eccDNA) into the Circulation. *Mol Cancer Res* **15**, 1197-1205, doi:10.1158/1541-7786.MCR-17-  
382 0095 (2017).
- 383 15 Shibata, Y. *et al.* Extrachromosomal microDNAs and chromosomal microdeletions in normal  
384 tissues. *Science* **336**, 82-86, doi:10.1126/science.1213307 (2012).
- 385 16 Turner, K. M. *et al.* Extrachromosomal oncogene amplification drives tumor evolution and  
386 genetic heterogeneity. *Nature*, doi:10.1038/nature21356 (2017).
- 387 17 Davoli, T. & de Lange, T. The causes and consequences of polyploidy in normal development and  
388 cancer. *Annu Rev Cell Dev Biol* **27**, 585-610, doi:10.1146/annurev-cellbio-092910-154234 (2011).
- 389 18 Bielski, C. M. *et al.* Genome doubling shapes the evolution and prognosis of advanced cancers.  
390 *Nat Genet* **50**, 1189-1195, doi:10.1038/s41588-018-0165-1 (2018).
- 391 19 Corces, M. R. *et al.* The chromatin accessibility landscape of primary human cancers. *Science*  
392 **362**, doi:10.1126/science.aav1898 (2018).
- 393 20 Davoli, T., Uno, H., Wooten, E. C. & Elledge, S. J. Tumor aneuploidy correlates with markers of  
394 immune evasion and with reduced response to immunotherapy. *Science* **355**,  
395 doi:10.1126/science.aaf8399 (2017).
- 396 21 Rheinbay, E. *et al.* Discovery and characterization of coding and non-coding driver mutations in  
397 more than 2,500 whole cancer genomes. *bioRxiv*, 237313, doi:10.1101/237313 (2017).
- 398 22 Taylor, A. M. *et al.* Genomic and Functional Approaches to Understanding Cancer Aneuploidy.  
399 *Cancer Cell* **33**, 676-689 e673, doi:10.1016/j.ccell.2018.03.007 (2018).
- 400 23 Hu, X. *et al.* TumorFusions: an integrative resource for cancer-associated transcript fusions.  
401 *Nucleic Acids Res* **46**, D1144-D1149, doi:10.1093/nar/gkx1018 (2018).
- 402 24 Alexandrov, L. B., Nik-Zainal, S., Wedge, D. C., Campbell, P. J. & Stratton, M. R. Deciphering  
403 signatures of mutational processes operative in human cancer. *Cell Rep* **3**, 246-259,  
404 doi:10.1016/j.celrep.2012.12.008 (2013).
- 405 25 Wala, J. A. *et al.* SvABA: genome-wide detection of structural variants and indels by local  
406 assembly. *Genome Res* **28**, 581-591, doi:10.1101/gr.221028.117 (2018).
- 407
- 408

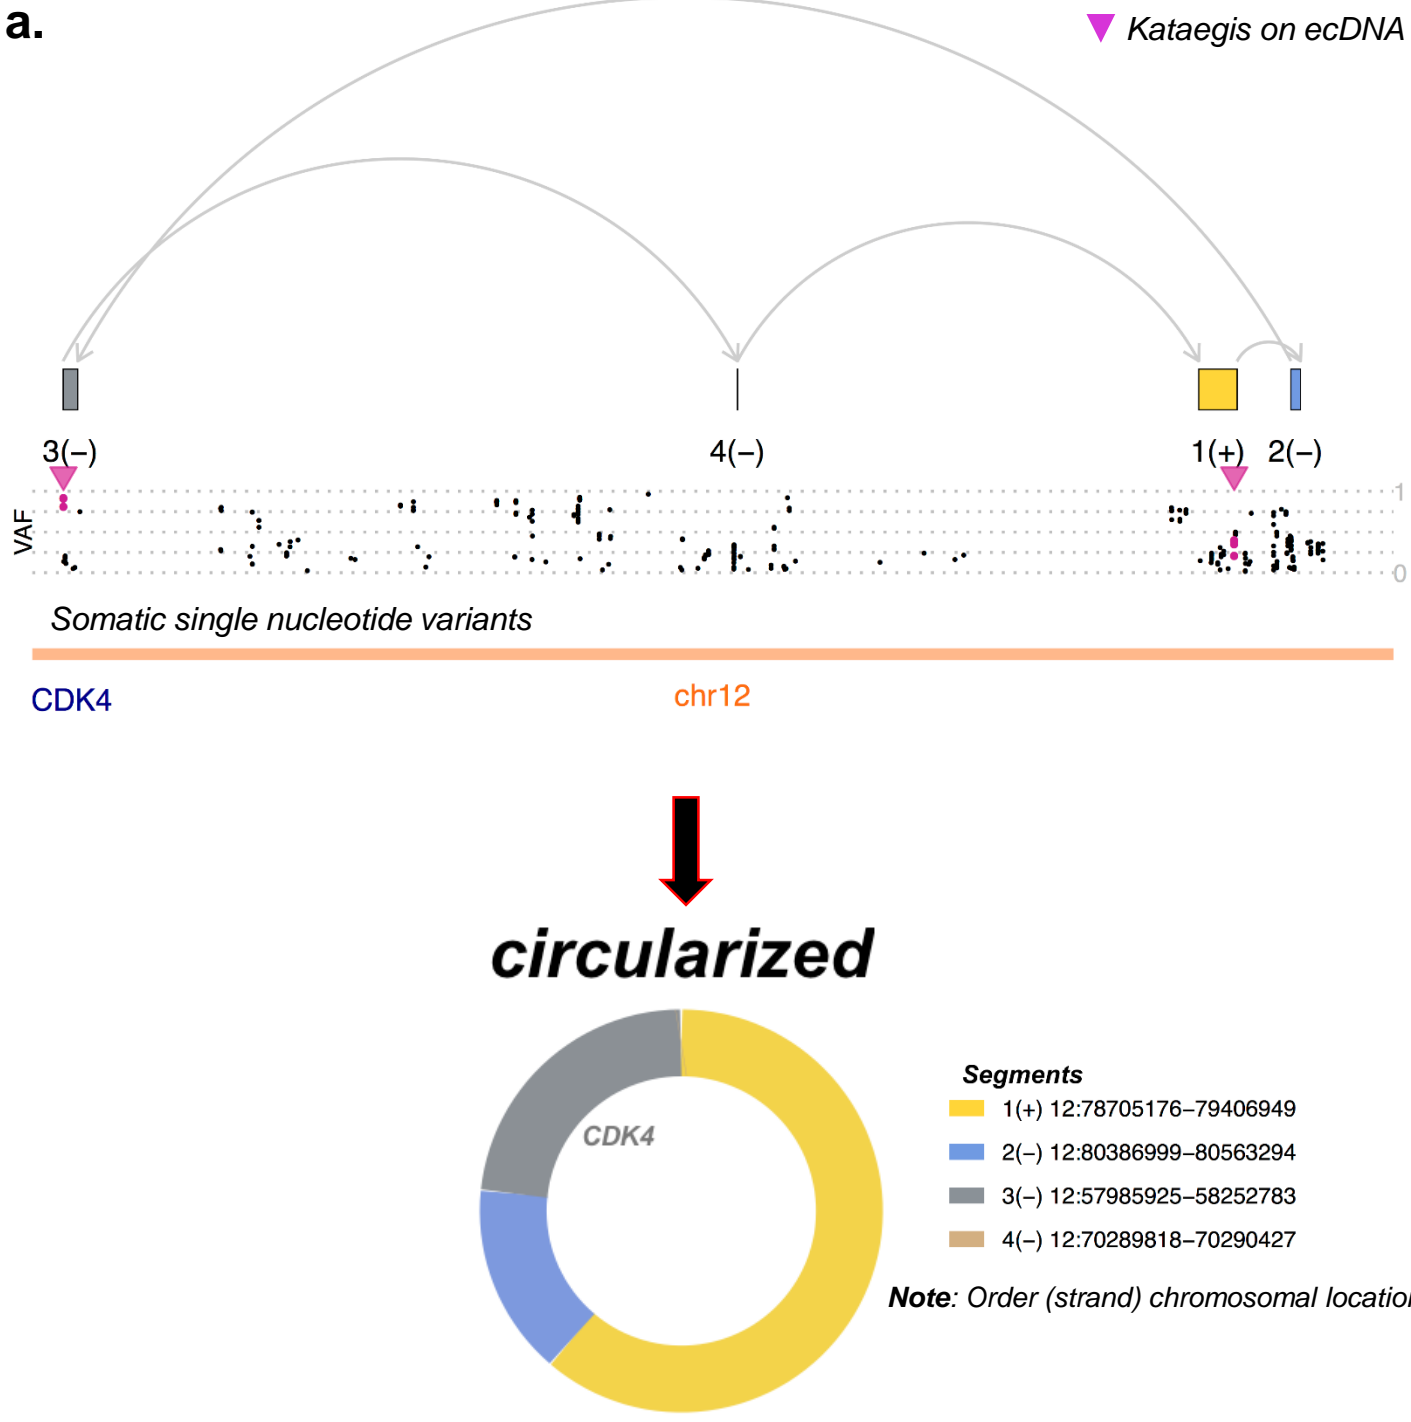

**Fig. 1 | Frequency of circular amplification across tumor and non-tumor tissues. A.** Representative example of a Circular DNA amplification.

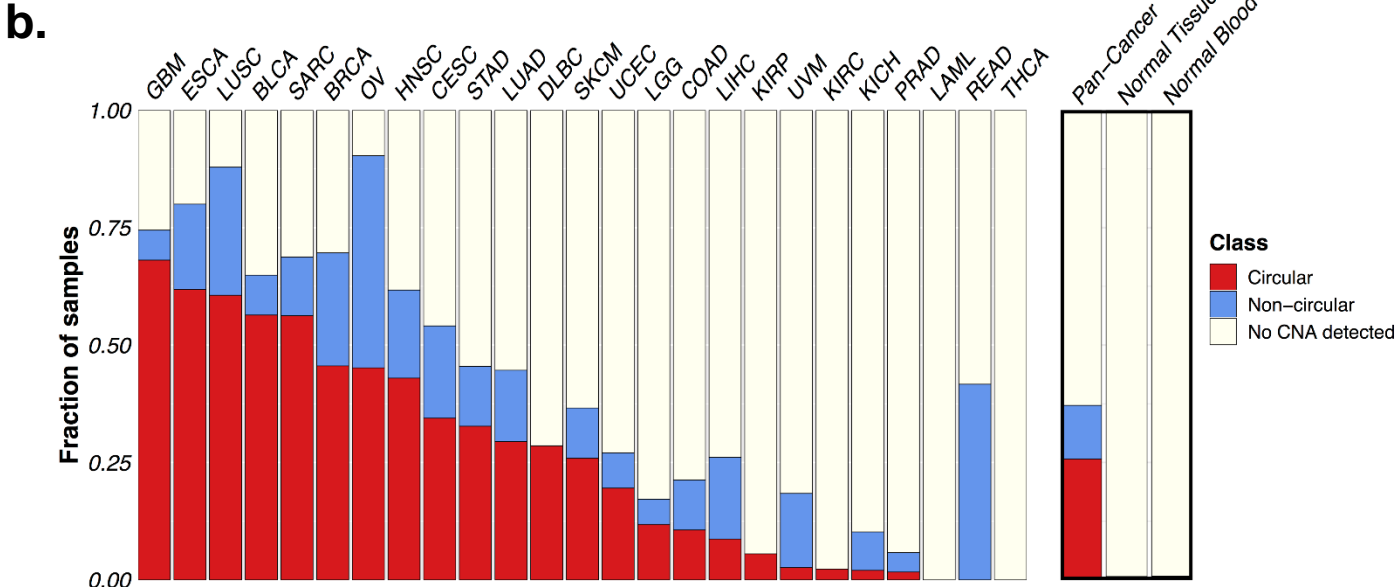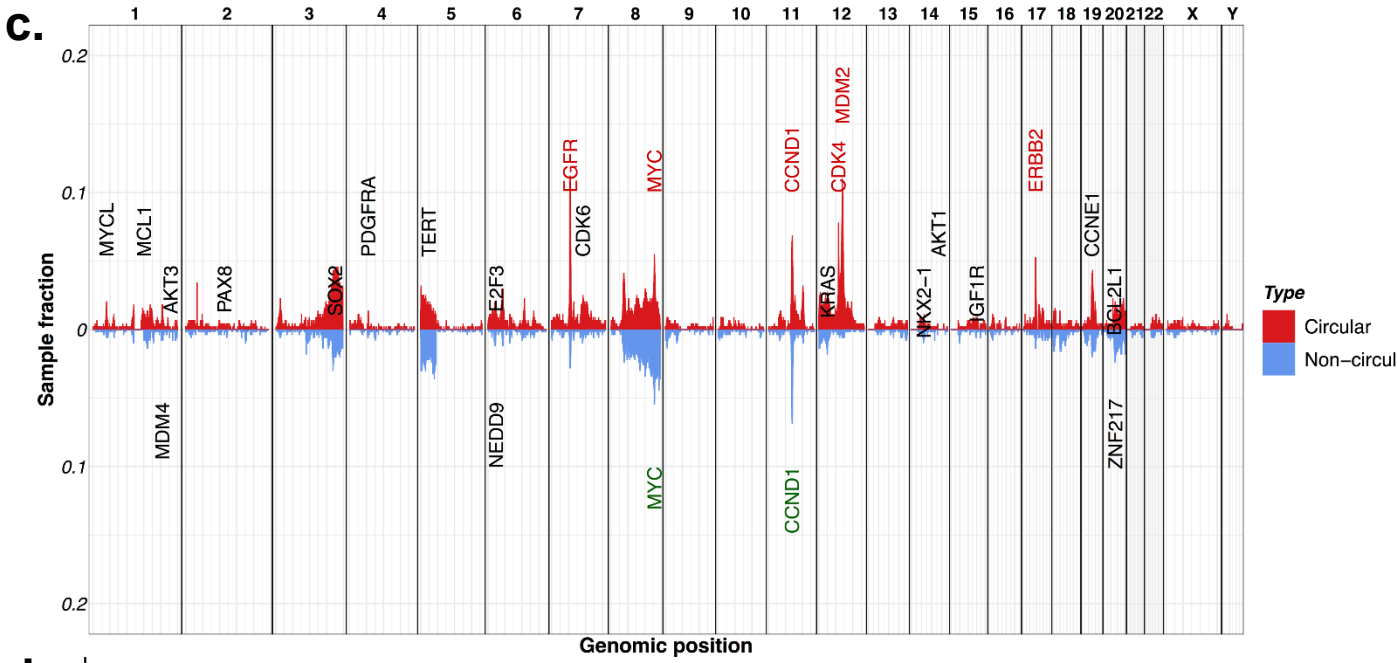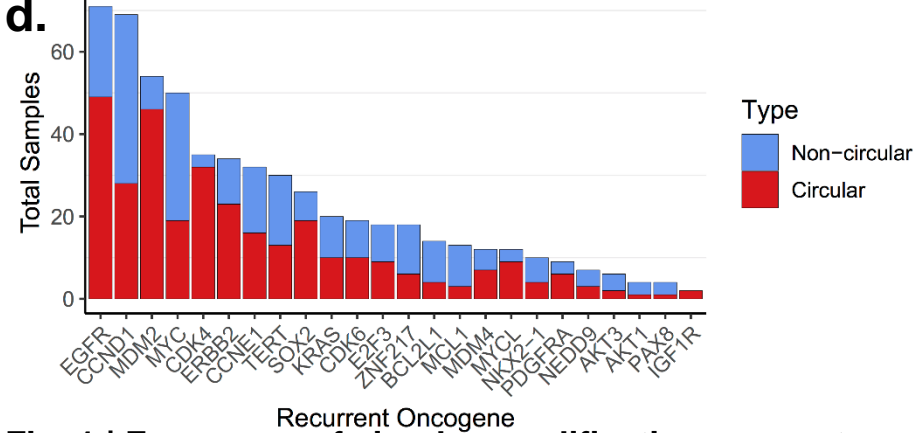

**Fig. 1 | Frequency of circular amplification across tumor and non-tumor tissues. B.** Distribution of circular, non-circular, and no copy number alteration (no CNA) detected categories by tumor and normal tissue. **C.** Genome-wide distribution of circular (red) and non-circular (blue) amplification peaks. **D.** Classification of circular vs non-circular amplification status by gene. Shown are 24 most frequently amplified oncogenes.

e.

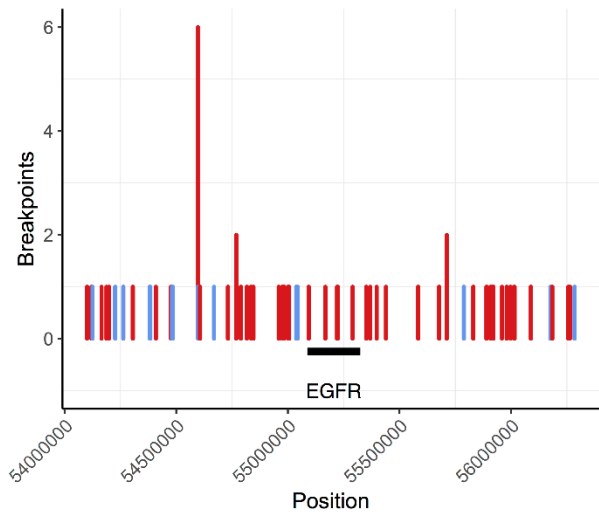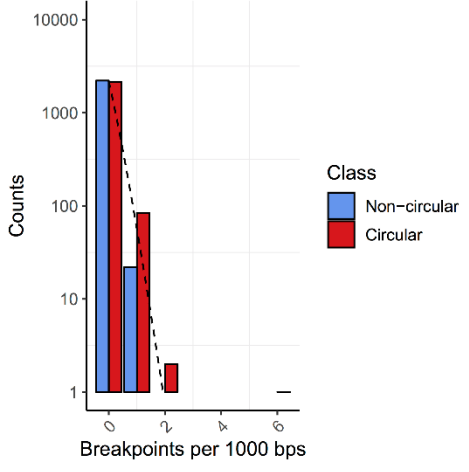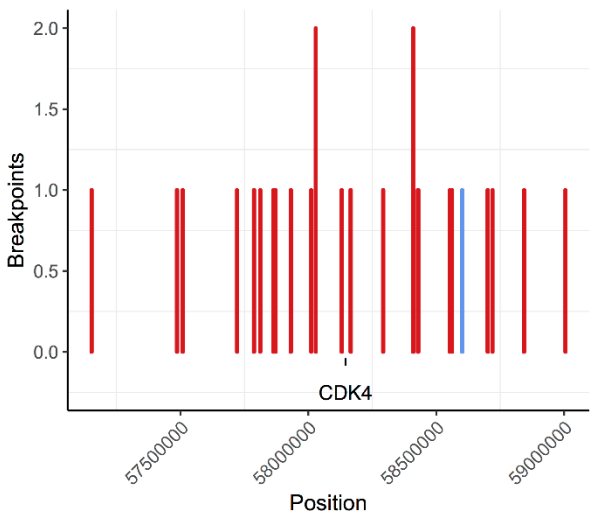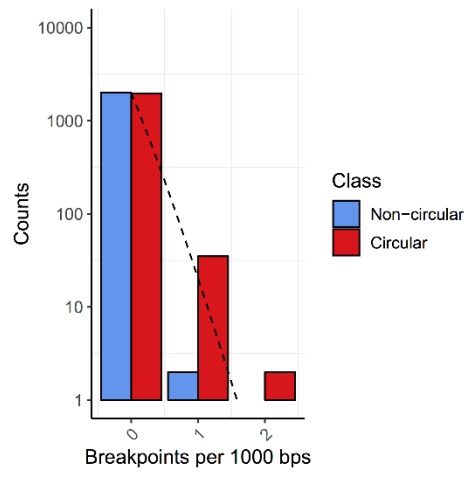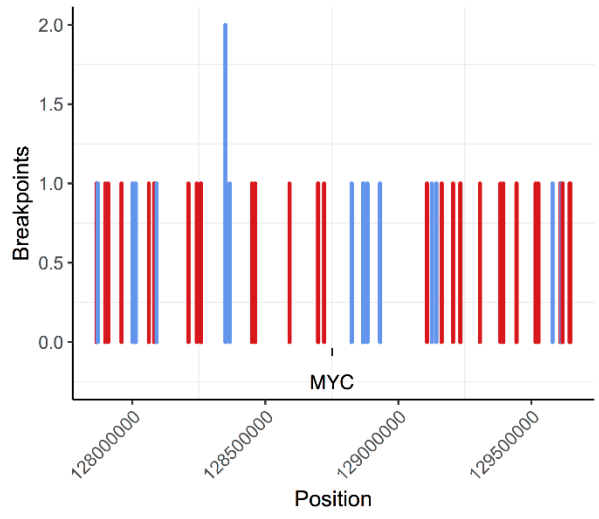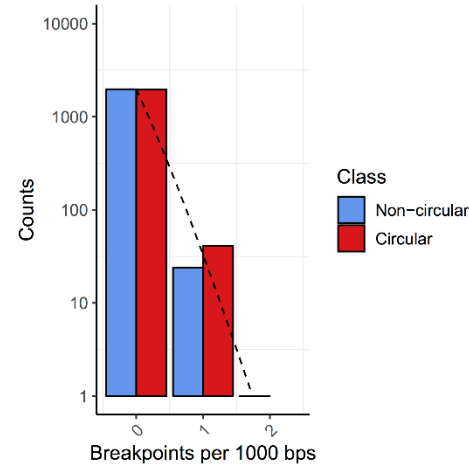

**Fig. 1 | Frequency of circular amplification across tumor and non-tumor tissues. E.** Breakpoint locations and distribution of breakpoints across all samples with amplified EGFR (top), CDK4 (middle), and MYC (bottom).



**a.**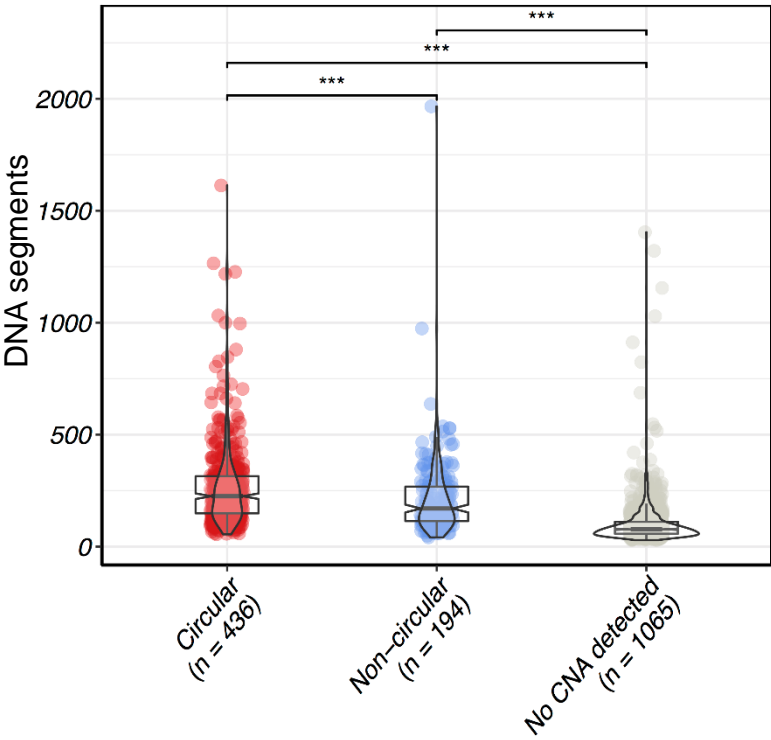**b.**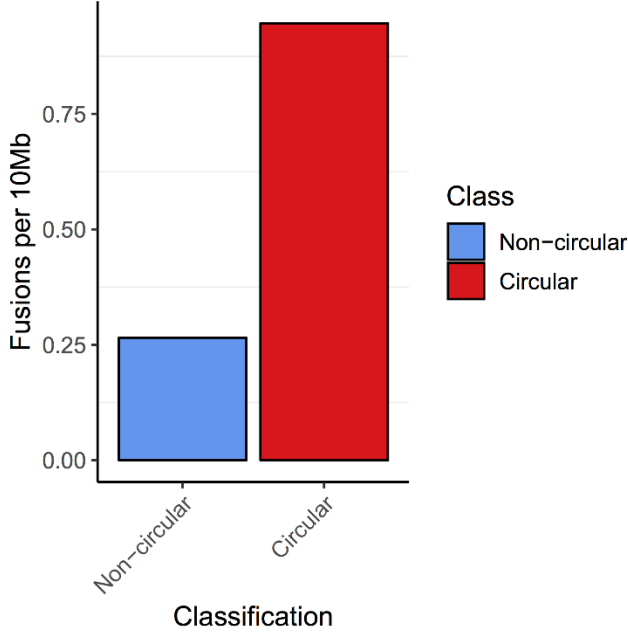

**Fig. 2 | Total number of copy number segments and transcript fusions are increased in Circular amplicon tumor samples. A.** TCGA copy number array data was used to count the total number of DNA segments within a sample. Circular samples contained statistically significantly more DNA segments than non-circular and no CNA detected ( $p\text{-val} < 1e\text{-}5$  and  $1e\text{-}128$ , respectively; Wilcoxon Rank Sum Test). **B.** Circular structures expressed significantly more gene fusions compared to non-circular amplicons, after size normalization.

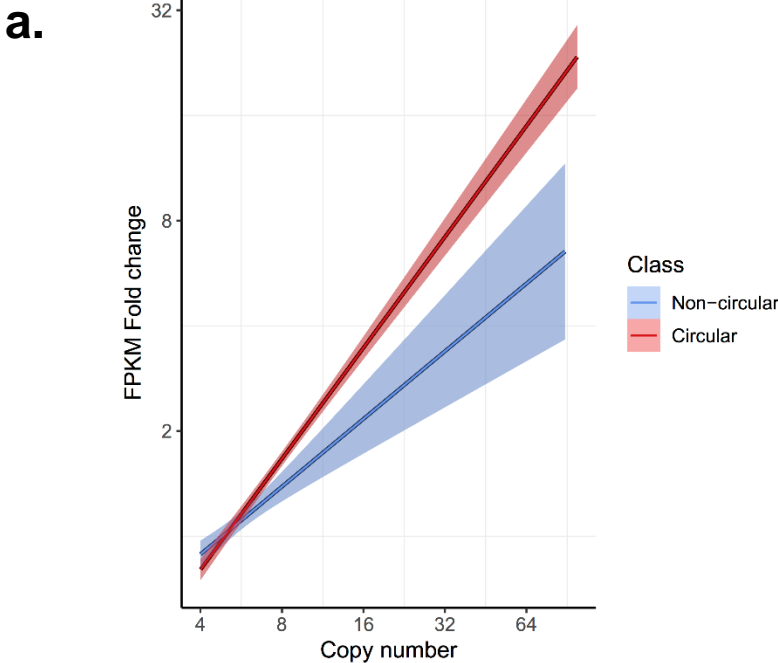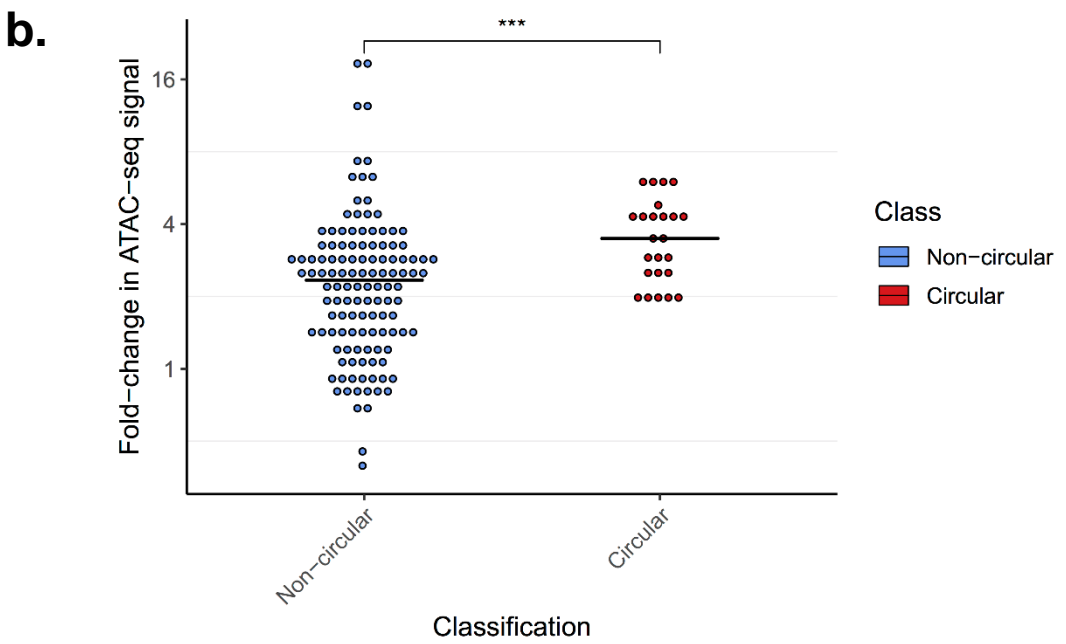

**Fig. 3 | Gene expression and chromatin accessibility of amplicon classes. A.** Copy number of the gene versus its fold-change in FPKM for all genes with a copy count greater than 4 and less than 100, for each gene on each amplicon. The fold-change in FPKM is computed as the gene's (FPKM-UQ+1) divided by the average of (FPKM-UQ+1) for the same gene in all other tumor samples from the same cohort for which the gene is not on any amplicon (i.e., not amplified). Linear regression lines are shown for each classification class. Tukey's range test shows genes on circular structures are significantly different to genes on non-circular structures ( $p$ -value  $< 1e-15$ ). **B.** For each amplicon in the 24 TCGA samples with ATAC-seq and AmpliconArchitect results, the log<sub>2</sub> fold-change in ATAC-seq signal across the amplicon relative to tissue types without amplification within the same region is shown. Each point represents a separate amplicon. The distribution of fold-change for circular amplicons is statistically significantly higher than non-circular (Wilcoxon rank sum test;  $p$ -value  $< 0.003$ ).

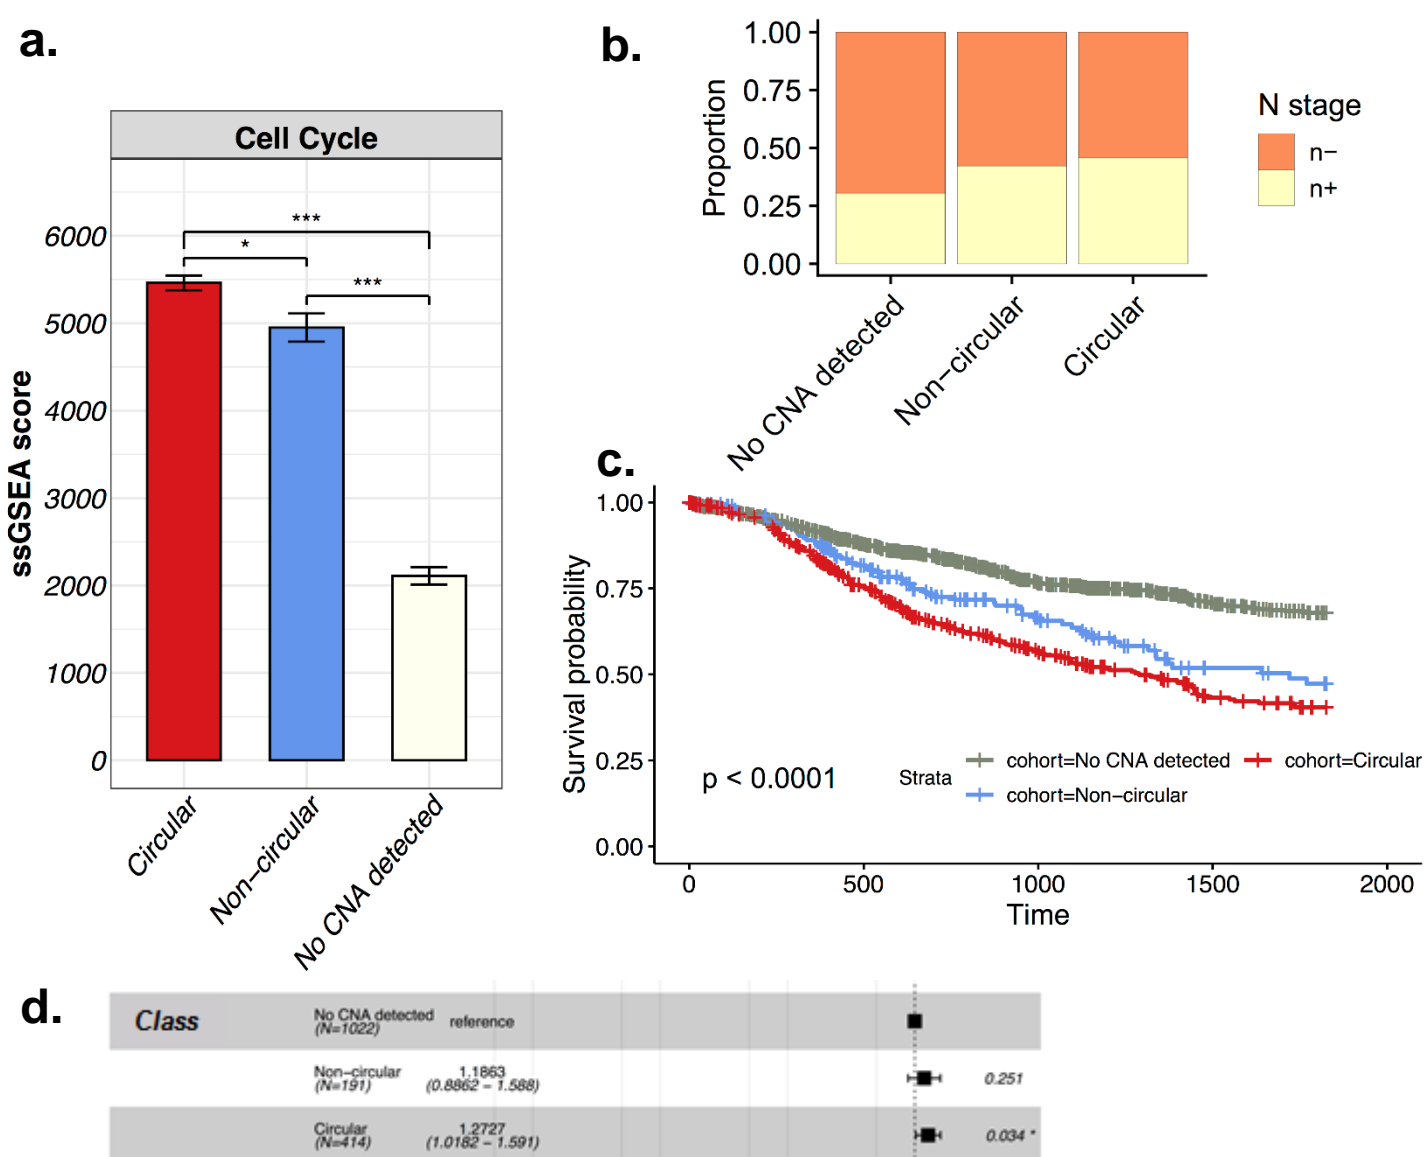

**Fig. 4 | Presence of circular amplification associates with poor outcomes. A.** Cell proliferation gene expression signature single sample GSEA (ssGSEA) scores by amplification category. Shown are means and 95% confidence intervals of the ssGSEA scores. Samples with circular structures showed significantly higher ssGSEA scores than samples with non-circular amplicons. **B.** Lymph node stage for primary tumors showing samples with amplification are more likely to have spread to the lymph node at time of diagnosis. **C.** Kaplan-Meier five-year survival curves by amplification category. Both amplified-noncircular and circular amplification have significantly worse outcome than No CNA samples ( $p$ -val  $< 1e-4$  and  $1e-15$ , respectively). Circular amplification has worse but not significant outcome compared to amplified-noncircular ( $p$ -val  $< 0.07$ ). **D.** Cox-Hazard model, incorporating disease and patient cohorts as parameters showing circular amplification results in significantly higher hazard rates.

**a.****Non-circular Amplicon**

Segments form structure without discordant edge or nearby segments connected by discordant reads without forming "head-to-tail" circular structure

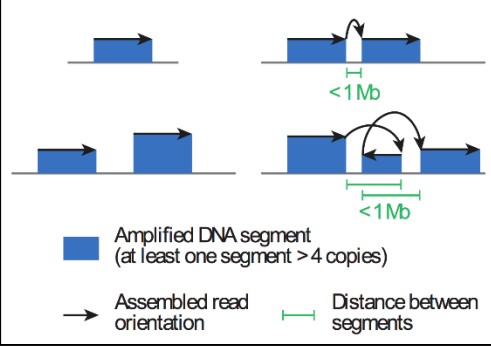**Heavily-rearranged Amplicon**

Distal (> 1 Mb) or inter-chromosomal segments connected by discordant reads without forming "head-to-tail" circular structure

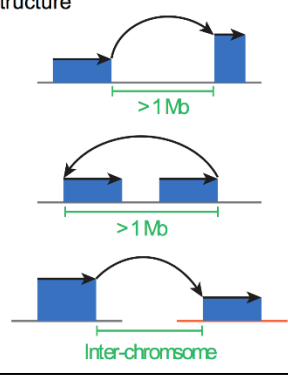**Circular Amplicon**

Segment(s) form "head-to-tail" structure > 10 Kb & > 4 copies

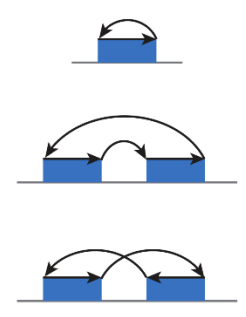

**Extended Data Fig. 1 | Amplicon classification. A.** Schematic representation of the three classification categories. Amplicons are classified using a hierarchical scheme based upon the genomic reconstruction of the amplified regions (i.e., any region with a copy count of 4 or greater) and the presence or absence of discordant edges between these regions. Amplicons must have a minimum 10kb of amplified regions in order to be considered a valid amplicon. The first category is circular amplicon, which is an amplicon that contains one or more amplified segments forming a cyclic path of at least 10kb bps in length and has an average amplification of four copies. The second category is heavily-rearranged amplicon, which is an amplicon that contains amplified segments that are connected by discordant read pairs, and at least one breakpoint junctions is inter-chromosomal or greater than 1Mb is size. The third category is non-circular amplicon, which is any amplicon that contains amplified segments with no discordant edges or with discordant edges, but all breakpoint junctions are less than 1 Mb in size. All other regions are considered not amplified. As the classification scheme is hierarchical, each amplicon can only have one class, and the highest rank class has precedent (i.e., an amplicon that is both circular and heavily-rearranged will be classified only as circular). As samples can have multiple amplicons, the sample is classified as the amplicon with highest precedent (i.e., a sample with 1 circular amplicon and 3 heavily-rearranged amplicons would be classified as circular).

**b.**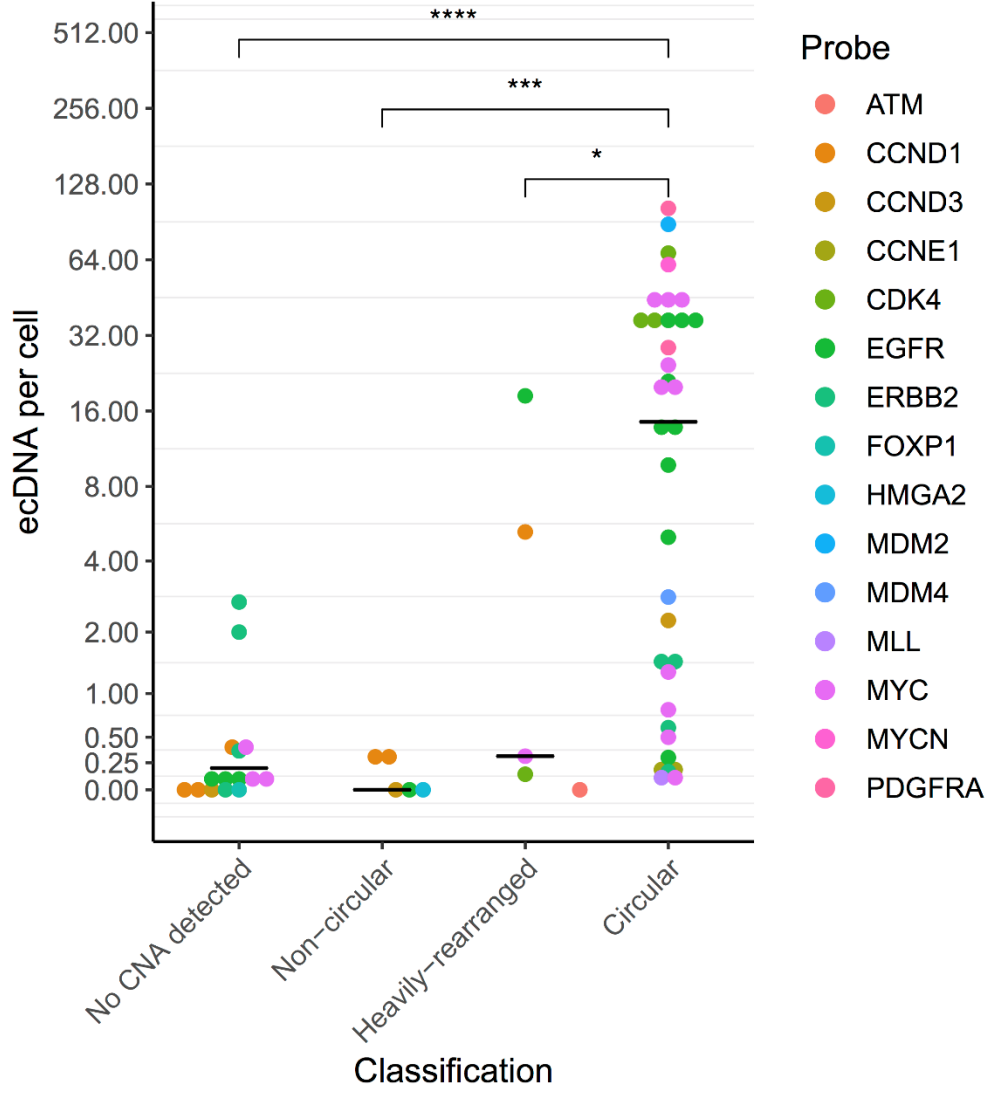

**Extended Data Fig. 1 | Amplicon classification. B.** Validation on cell line data. Validation of the classification scheme on cell line data with FISH experiments for detecting ecDNA from the Turner et al. and deCarvalho et al. studies. FISH probes were designed for selected oncogenes and DAPI staining was performed to determine whether the FISH probe landed on chromosomal DNA or ecDNA. For each cell (represented as an image of the cell in metaphase), the number of positive ecDNA probes were counted, and for each cell line, the average positive ecDNA per cell was reported. For each probe, we report whether it landed in an amplicon (inferred from AA), and if so, what was the amplicon's classification. The distribution for the average ecDNA per cell between the circular and heavily rearranged ( $p$ -value  $< 0.05$ ; Wilcoxon rank sum test) and No CNA detected/heavily rearranged were statistically significantly different ( $p$ -value  $< 0.001$ ; Wilcoxon rank sum test).



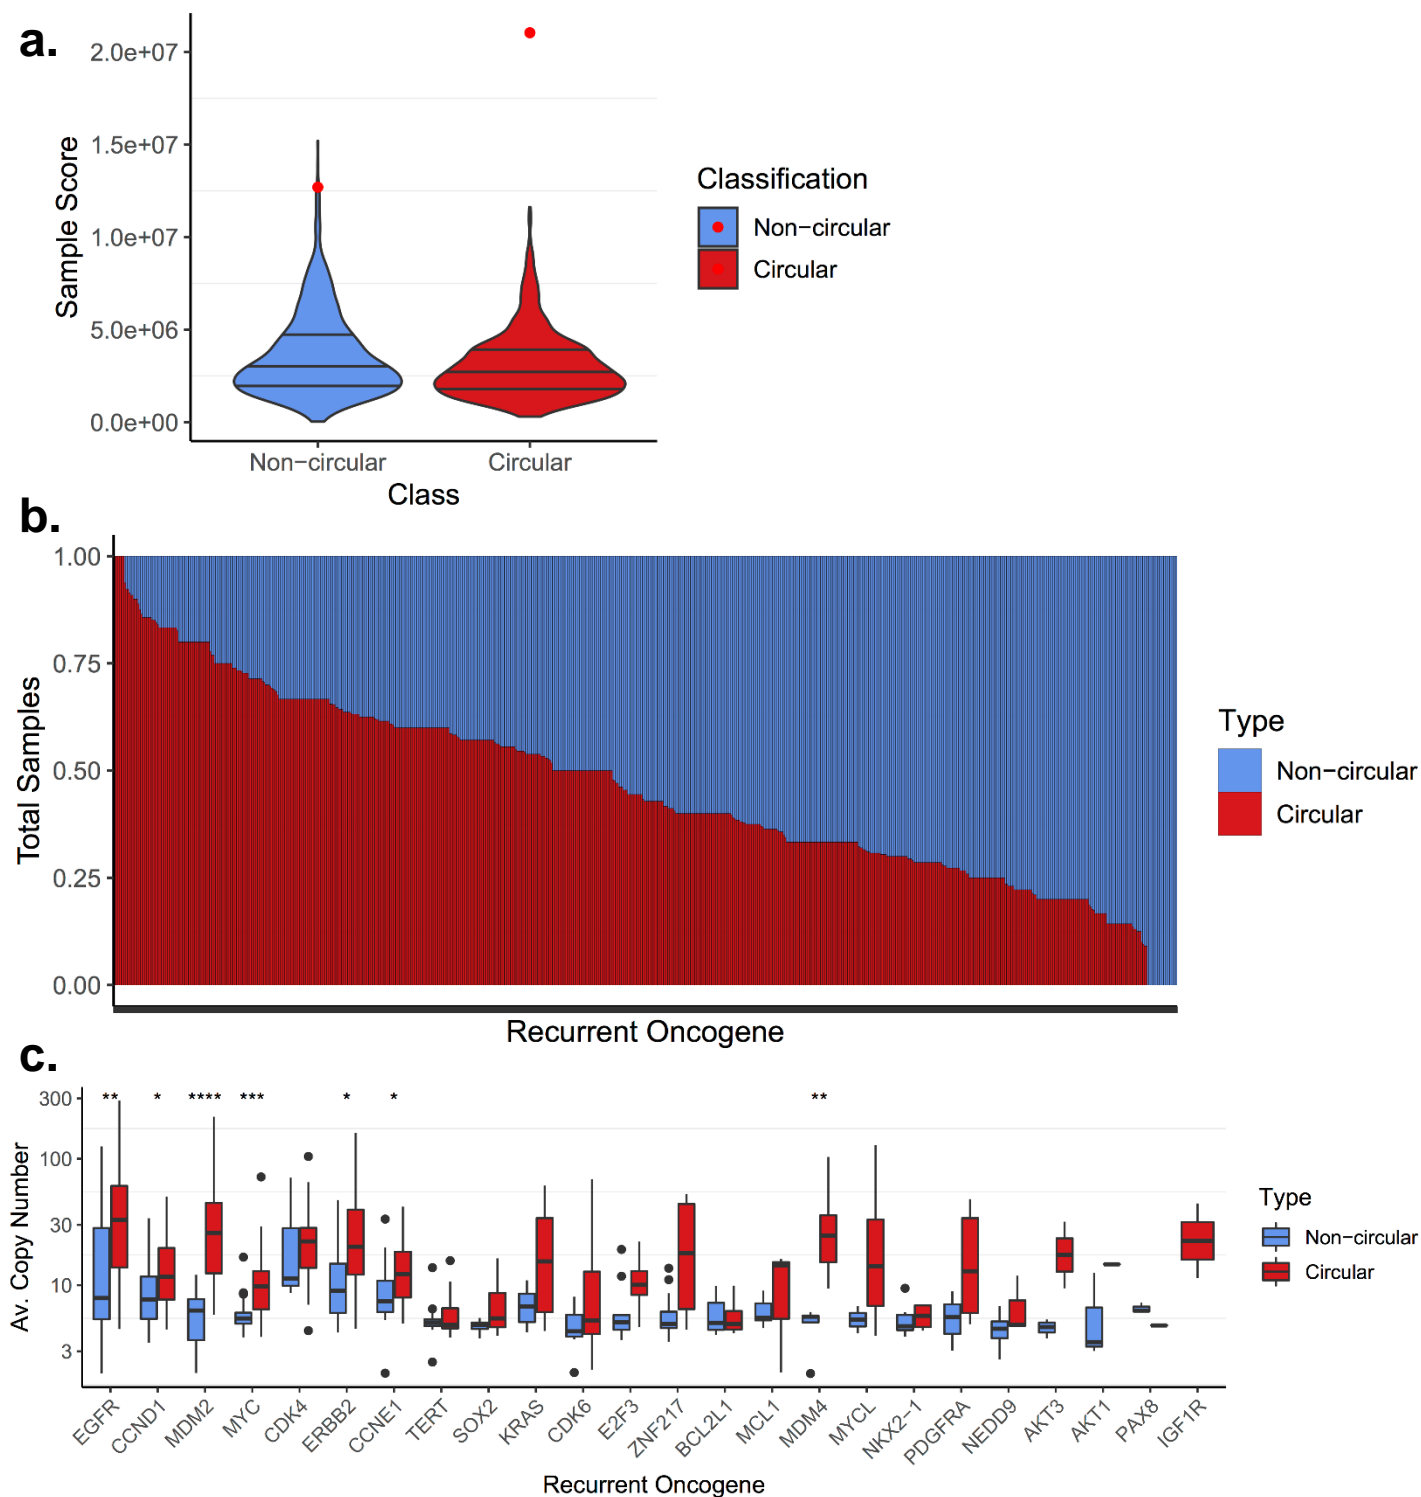

**Extended Data Fig. 3. Circular vs amplified non-circular amplification comparisons.**

**A.** 24 recurrently amplified oncogenes significantly overlap circular regions (z-score 10.9), especially compared to amplified non-circular (z-score 4.0).

**B.** For all oncogenes with copy number  $\geq 4$  (defined from the DNA copy number array data) and present in at least 5 samples, we show the class distribution of that oncogene. The oncogenes are ordered by proportion on circular amplification.

**C.** For the 24 recurrent oncogenes known to be activated via amplification (**Zack et al. Nat Gen. 2013**), we report the average copy number for the oncogenes for circular amplification versus amplified-noncircular amplification.

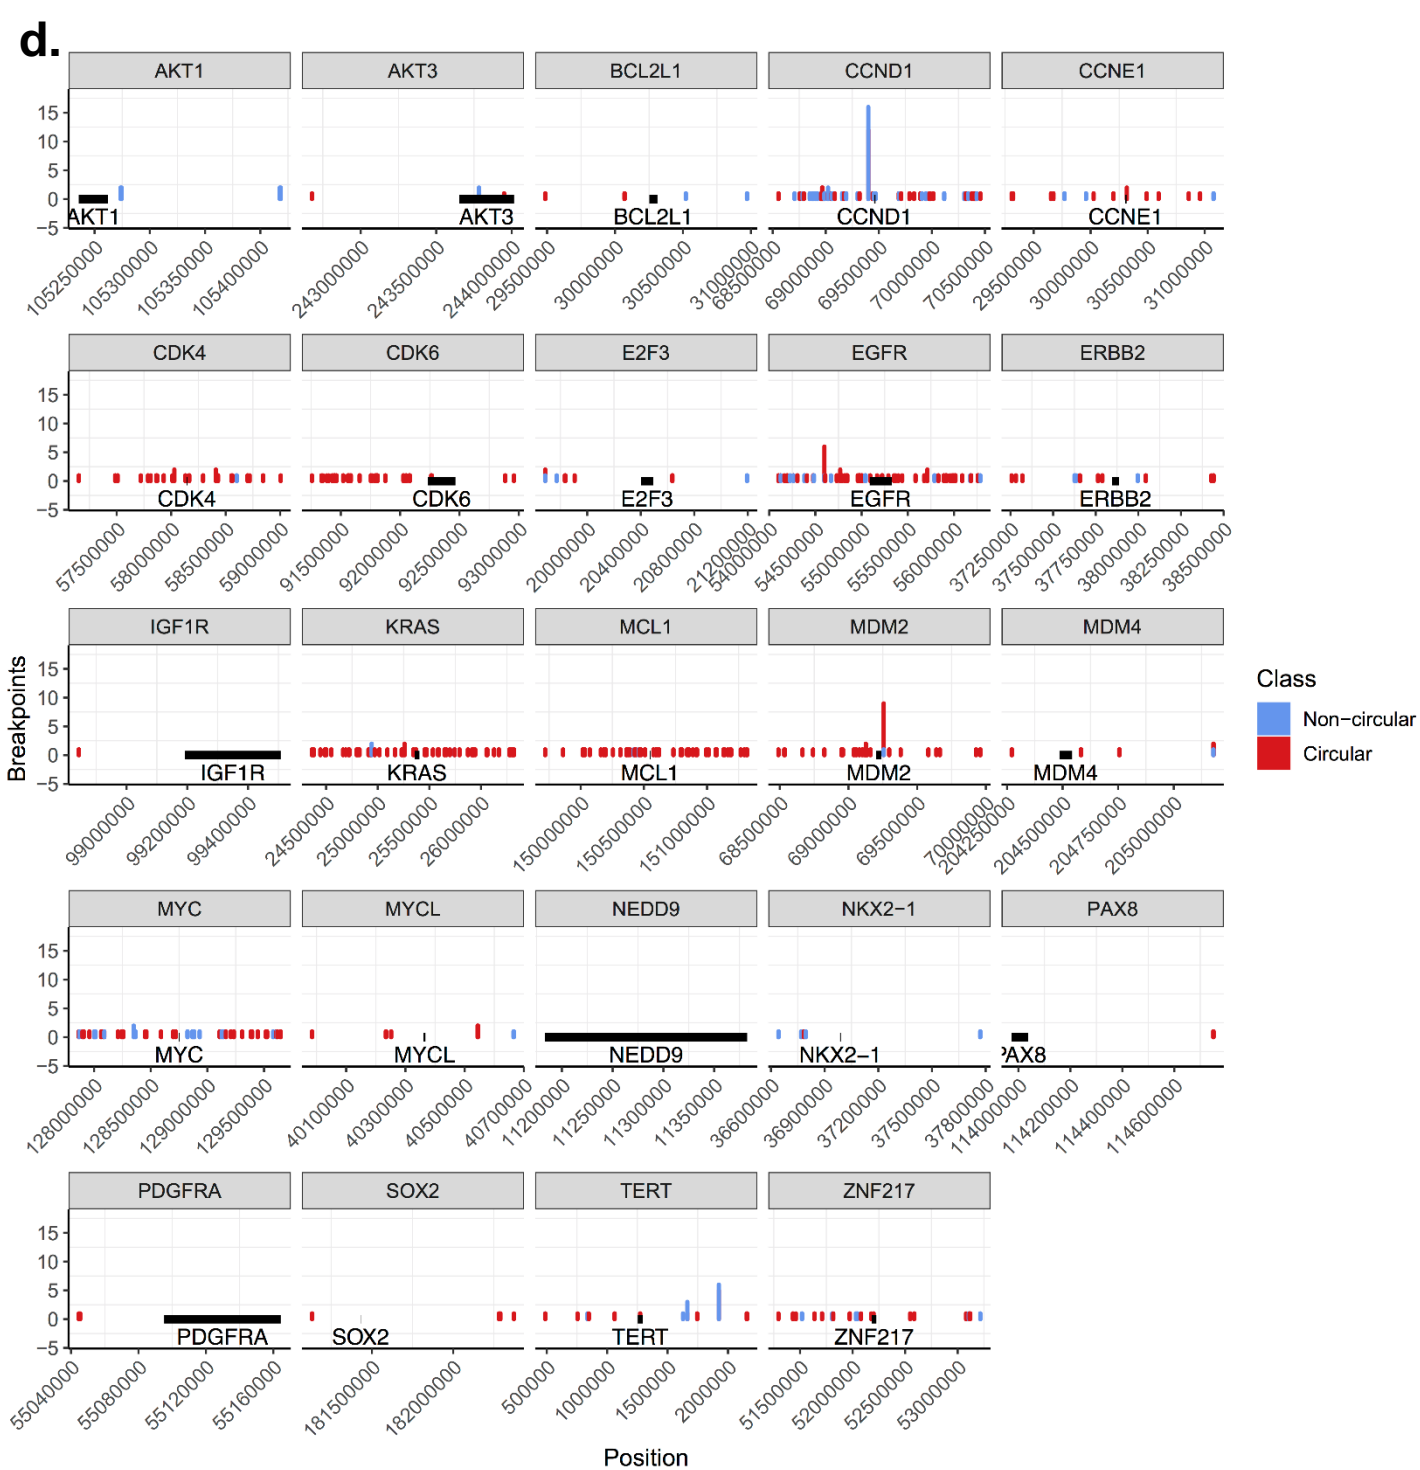

**Extended Data Fig. 3. Circular vs amplified non-circular amplification comparisons. D.** Breakpoint locations across the 24 recurrent oncogenes activated by amplification. Outliers in CCND1 and MDM2 were results of mapping bias due to short ALU repeats near the oncogene region.



e.

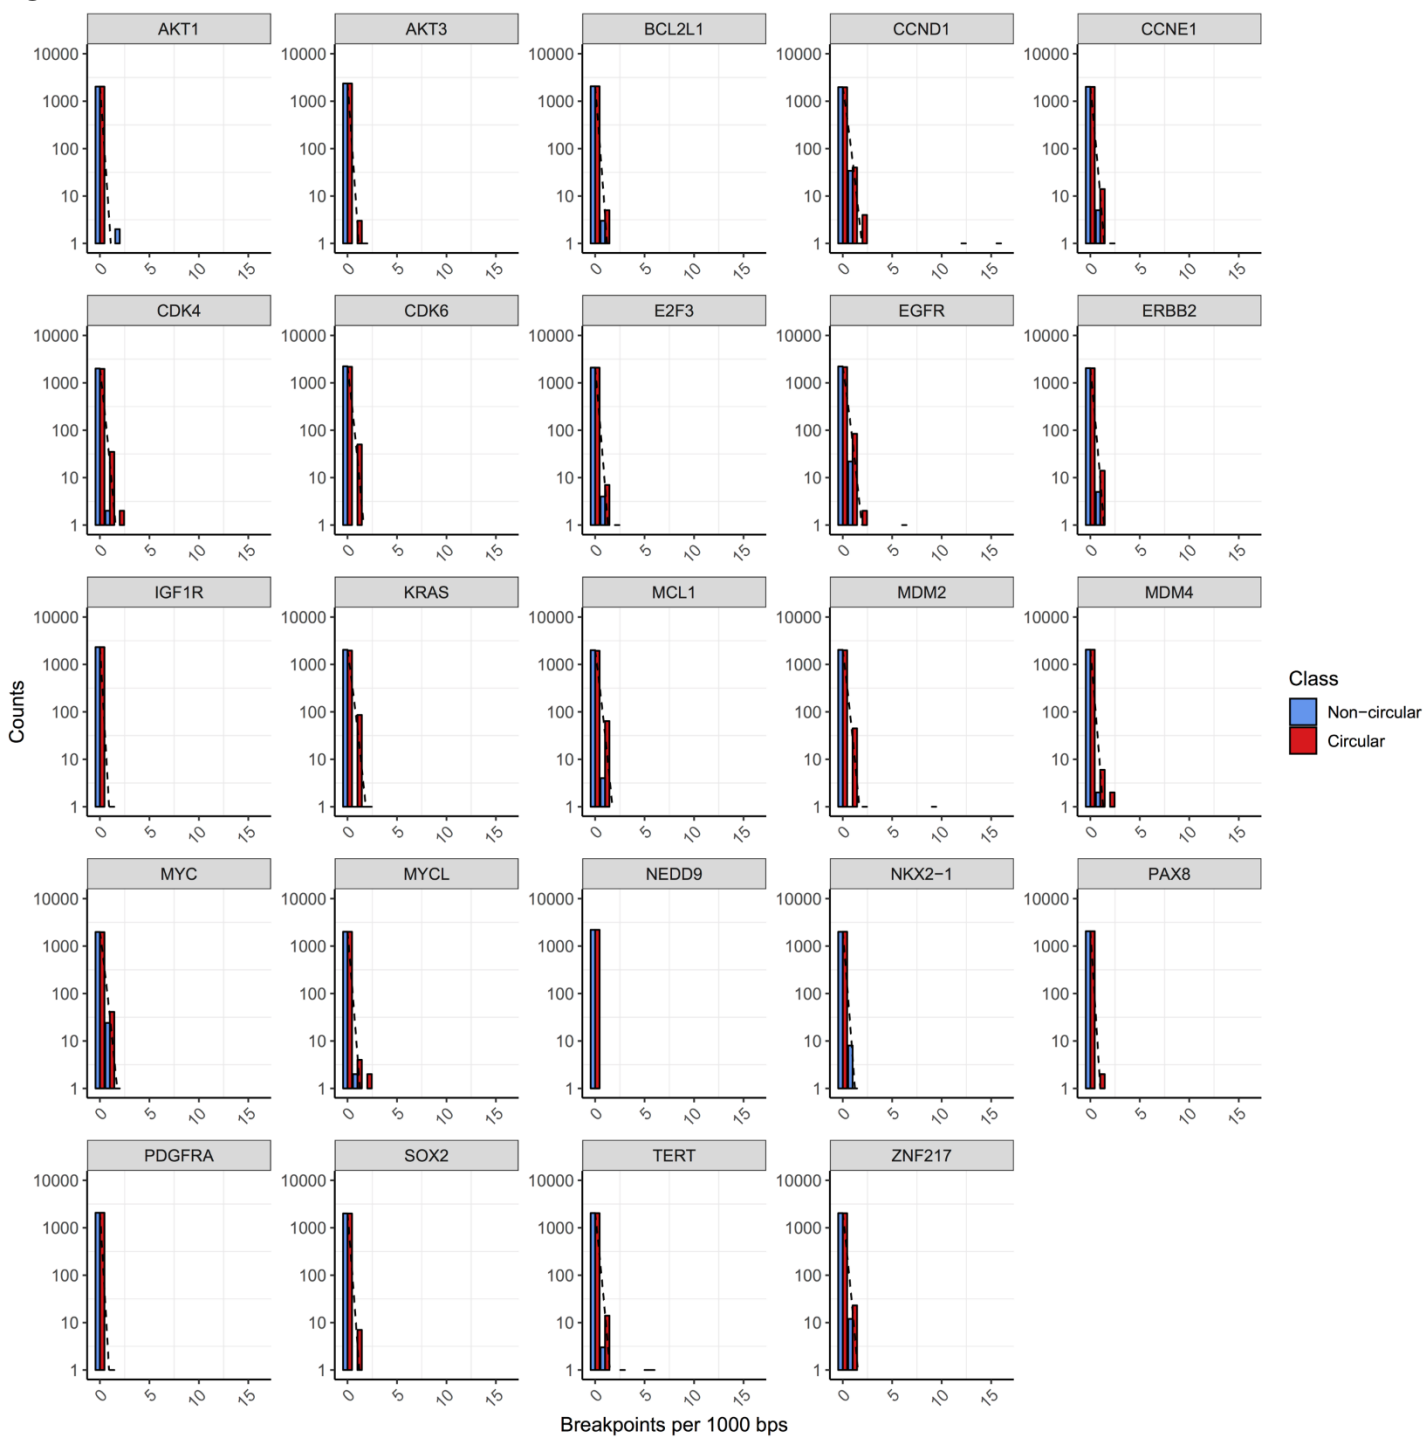

**Extended Data Fig. 3. Circular vs amplified non-circular amplification comparisons. E. Breakpoint locations across the 24 recurrent oncogenes activated by amplification.**

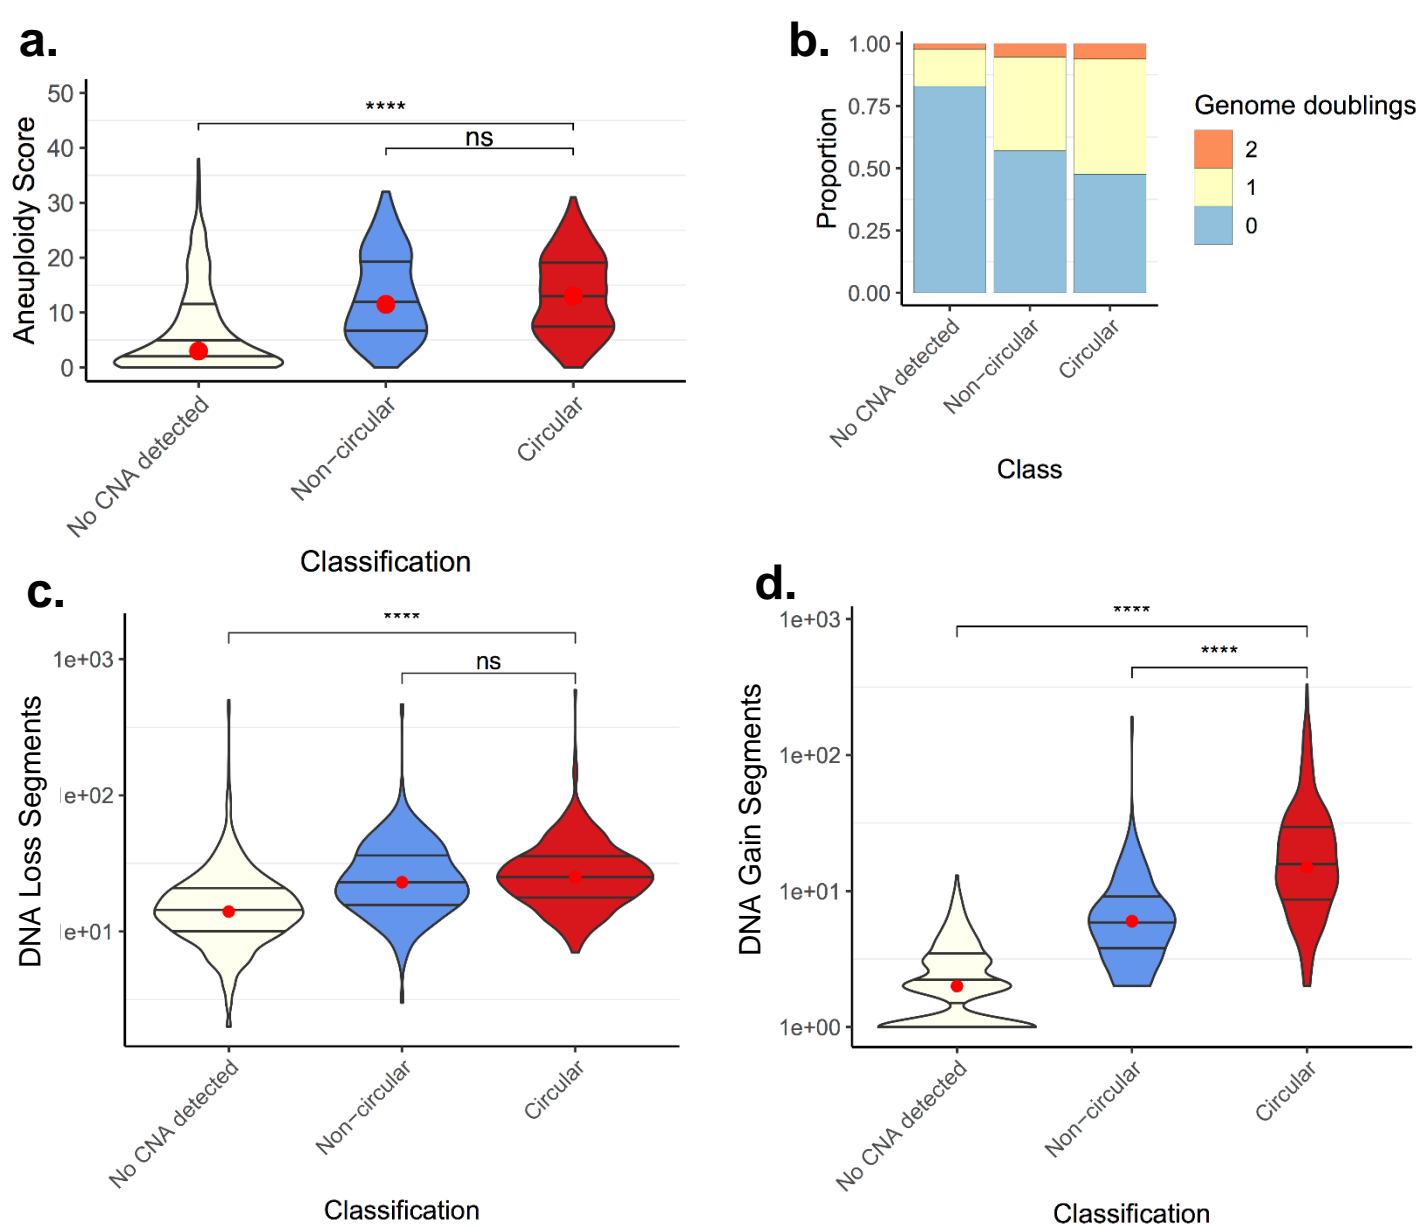

**Extended Data Fig. 4 | Aneuploidy and genomic instability events by amplification class. A.** Chromosome arm aneuploidy scores showing no difference in chromosomal arm level events between amplified-noncircular and circular amplification. **B.** Genome doublings distribution across classes showing no difference in distribution between amplified-noncircular and circular amplification. Circular amplification and non-amplified are different (Chi-square test;  $p\text{-val} < 1e-12$ ). Circular amplification and amplified-noncircular are not different (Chi-square test;  $p\text{-val} < 0.10$ ). **C.** Distribution for total DNA loss segments by amplification class. TCGA CNV array data was used to count the total number of DNA losses within a sample. A DNA loss was defined as a segment with  $CN \leq 1$ . **D.** Same as C, but for gain segments ( $CN \geq 4$ ). Circular samples contain statistically significantly more DNA gains than non-circular and no-CNA detected ( $p\text{-val} < 1e-14$  and  $1e-127$ , respectively; Wilcoxon Rank Sum Test). Non-circular contain statistically significantly more DNA gains than no-CNA detected ( $p\text{-val} < 1e-35$ ).

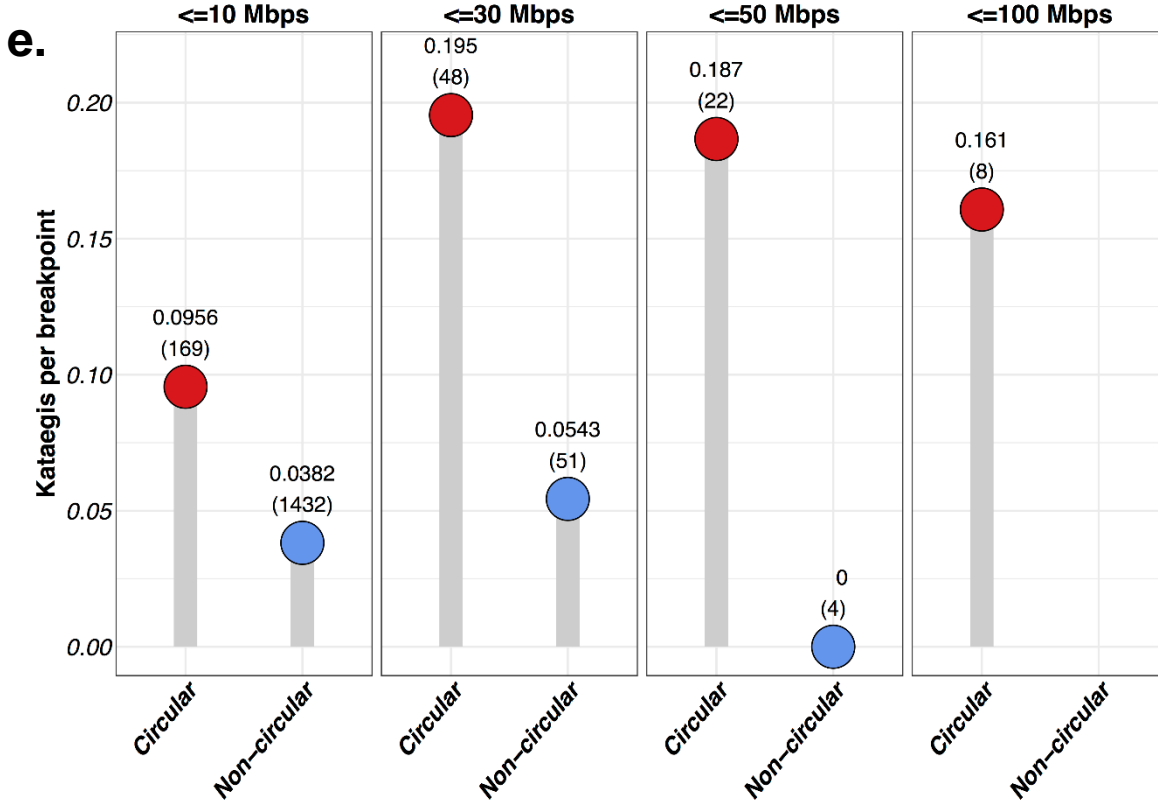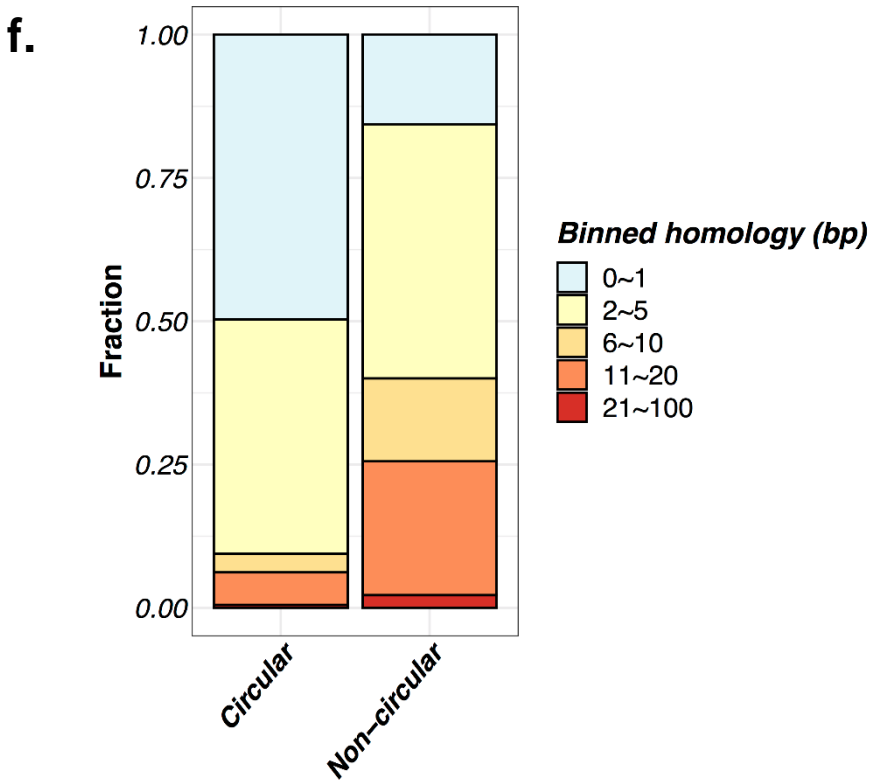

**Extended Data Fig. 4 | Aneuploidy and genomic instability events by amplification class. E.** Kataegis frequency differences between amplification categories. Amplicons were grouped into Amplicon-size bins, and # kataegis frequency was normalized for the number of DNA breakpoints, demonstrating a higher occurrence of kataegis in Circular compared to Non-circular amplifications. The number of amplicons used is shown in parentheses. **F.** Breakpoint homology by amplification class. Note that inserted sequences were excluded.

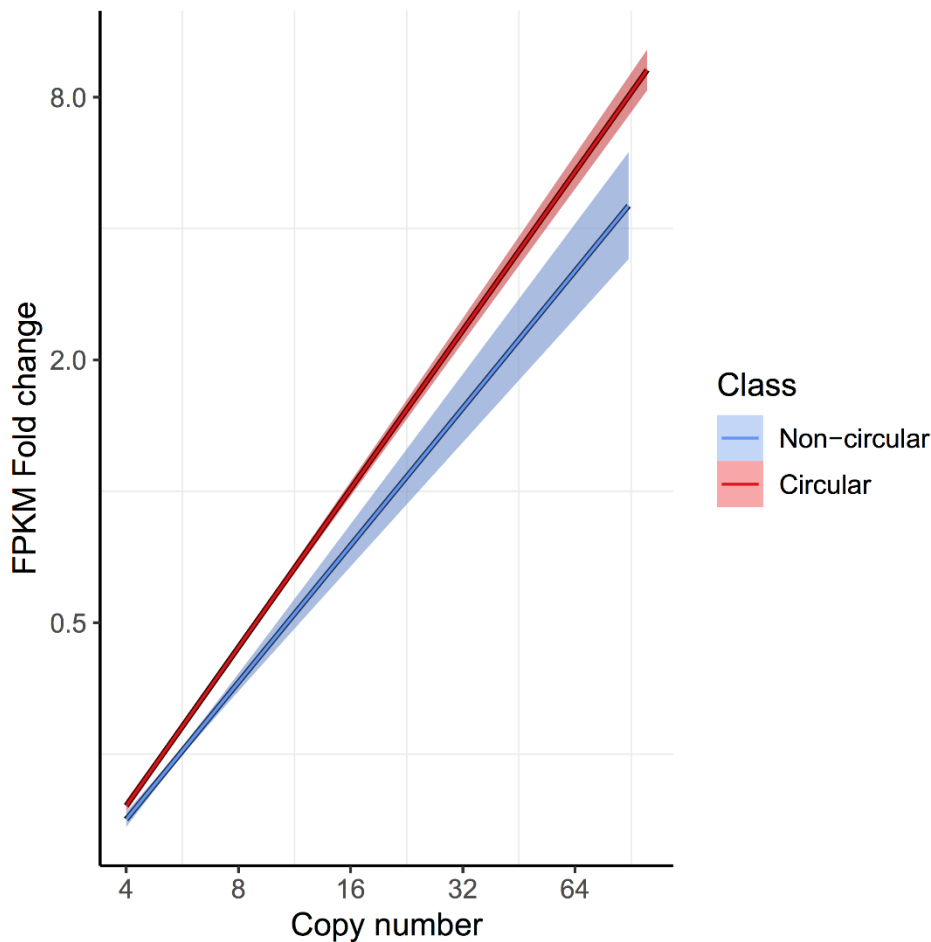

**Extended Data Fig. 5 | FPKM fold-change versus copy number.** For each gene on each amplicon, we report the copy number of the gene versus its fold-change in FPKM for all genes with a copy count greater than 4 and less than 100. The fold-change in FPKM is computed as the gene's (FPKM-UQ+1) divided by the average of (FPKM-UQ+1) for the same gene in all other tumor samples from the same cohort for which the gene is not on any amplicon (i.e., is not amplified). Linear regression lines are shown for each classification class. Tukey's range test shows genes on circular structures are significantly different to genes on non-circular structures (p-value < 1e-15).

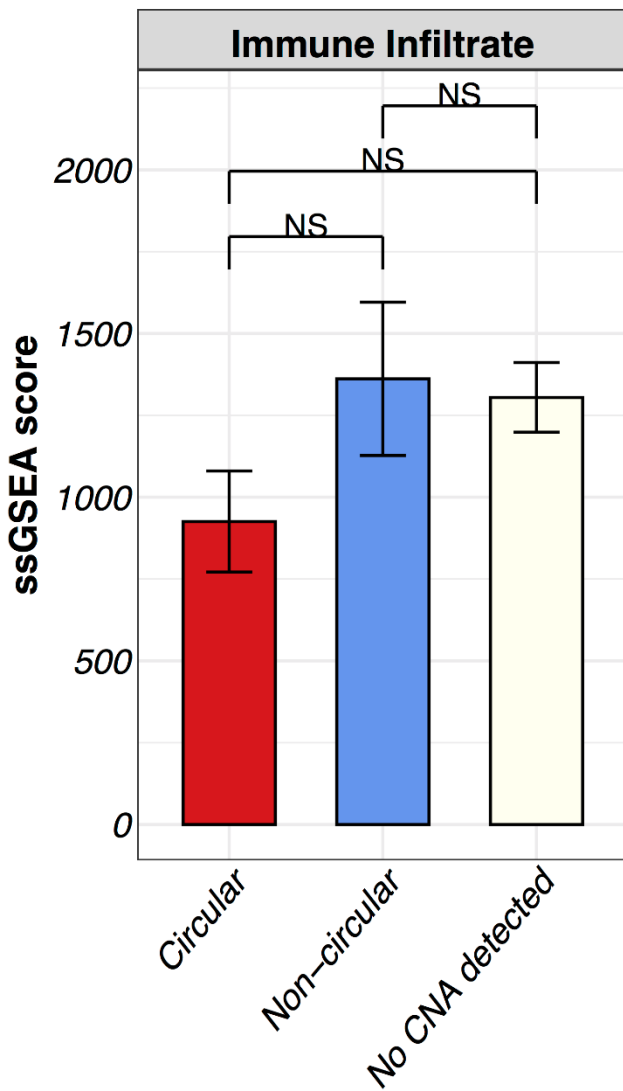

**Extended Data Fig. 6 | Circular amplification associates with worse outcomes.**

Immune gene expression signature single sample GSEA (ssGSEA) scores by amplification category. Shown are means and 95% confidence intervals of the ssGSEA scores. No significant difference was observed between classes.
